# 1 **Right Anterior Temporal Degeneration, Emotions, and Loss** 2 **of Nonverbal Semantics: The Emotional Semantic Variant** 3 **Frontotemporal Dementia**

4  
5 Kyan Younes,<sup>1</sup> Valentina Borghesani,<sup>1</sup> Maxime Montembeault,<sup>1</sup> Salvatore Spina,<sup>1</sup> Maria Luisa  
6 Mandelli,<sup>1</sup> Ariane E. Welch,<sup>1</sup> Elizabeth Weis,<sup>1</sup> Patrick Callahan,<sup>1</sup> Fanny M. Elahi,<sup>1</sup> Alice Y. Hua,<sup>1</sup>  
7 David C. Perry,<sup>1</sup> Anna Karydas,<sup>1</sup> Daniel Geschwind,<sup>2</sup> Eric Huang,<sup>3</sup> Lea T. Grinberg,<sup>1,3</sup> Joel H.  
8 Kramer,<sup>1</sup> Adam L. Boxer,<sup>1</sup> Gil D. Rabinovici,<sup>1</sup> Howard J. Rosen,<sup>1</sup> William W. Seeley,<sup>1,3</sup> Zachary  
9 A. Miller,<sup>1</sup> Bruce L. Miller,<sup>1</sup> Virginia E. Sturm,<sup>1†</sup> Katherine P. Rankin,<sup>1†</sup> and Maria Luisa Gorno-  
10 Tempini.<sup>1,4†</sup>

11 <sup>1</sup> Memory and Aging Center, Department of Neurology, UCSF Weill Institute for Neurosciences,  
12 University of California, San Francisco, CA, USA

13 <sup>2</sup> Neurogenetics Program, Department of Neurology and Semel Institute for Neuroscience and  
14 Human Behavior, David Geffen School of Medicine, University of California Los Angeles

15 <sup>3</sup> Department of Pathology, University of California, San Francisco, CA 94143, USA

16 <sup>4</sup> Dyslexia Center, University of California, San Francisco

17 † These authors contributed equally to this work.

18 Correspondence to: Kyan Younes, MD

19 Address: Sandler Neurosciences Center

20 675 Nelson Rising Lane, Suite 190

21 San Francisco, California, 94158

22 Email: [Kyan.Younes@ucsf.edu](mailto:Kyan.Younes@ucsf.edu)

23 **Running title:** Emotional semantic variant frontotemporal dementia.

24 **Keywords:** Right temporal lobe predominant neurodegeneration; loss of empathy and nonverbal  
25 semantics, person-specific knowledge, frontotemporal dementia; FTLT-TDP type C.

26 **Abbreviations:**

27 bvFTD = behavioral variant frontotemporal dementia; esvFTD = emotional semantic variant  
28 frontotemporal dementia; FTD = frontotemporal dementia; FTLT = frontotemporal lobar  
29 degeneration; rATL = right anterior temporal lobe; lATL = left anterior temporal lobe; sd =  
30 standard deviation; svPPA = semantic variant primary progressive aphasia; TDP-43 = transactive  
31 response DNA binding protein 43

## 32 **Abstract:**

33 It has been proposed that focal anterior temporal lobe (ATL) degeneration is a specific, unitary  
34 FTLT-DTP-related disease that initially preferentially affects the left or right hemisphere. Patients  
35 with early left ATL (LATL) atrophy show severe anomia and verbal semantic deficits and meet  
36 criteria for semantic variant primary progressive aphasia (svPPA) and semantic dementia,  
37 prompting appropriate neurological care. There is less consensus regarding the symptoms in right  
38 ATL (rATL) predominant cases, who most often present with behavioral and emotional changes  
39 leading to a misdiagnosis of a psychiatric disorder, and later of behavioral variant frontotemporal  
40 dementia (bvFTD). Uncertainties regarding early symptoms and lack of an overarching framework  
41 continues to hinder proper diagnosis and care of patients with rATL disease. Here, we present  
42 symptom chronology, cognitive and socioemotional profiles of a large, well-characterized,  
43 longitudinally followed cohort of patients with rATL-predominant degeneration and propose new  
44 criteria and nosology for the syndrome.

45  
46 We identified individuals with a clinical diagnosis of bvFTD or svPPA and a structural MRI  
47 (n=478). Based on neuroimaging criteria, we identified three groups: patients with rATL-  
48 predominant atrophy with relative sparing of the frontal lobes (n=46), patients with frontal-  
49 predominant atrophy with relative sparing of the rATL (n=79), and patients with LATL-  
50 predominant atrophy with relative sparing of the frontal lobes (n=75). Seventy-eight patients had  
51 undergone autopsy. We analyzed patients' clinical, neuropsychological, genetic, anatomical, and  
52 pathological profiles.

53  
54 In the rATL-predominant group, the earliest symptoms were loss of empathy (27%), person-  
55 specific semantic impairment (23%), and complex compulsions and rigid thought process (18%).  
56 On testing, this group exhibited greater impairments in emotional theory of mind, identifying  
57 famous people from names and face, and facial affect naming (despite preserved face perception)  
58 than the LATL- and frontal-predominant groups. The clinical features were highly sensitive (81%)  
59 and specific (84%) in differentiating rATL from bvFTD in the first three years of the disease.  
60 FTLT-DTP (84%) was the most common pathology.

61  
62 Our results suggest that rATL-predominant degeneration is characterized by early loss of empathy  
63 and person-specific knowledge, deficits that are caused by progressive loss of semantic memory  
64 for concepts of social-emotional relevance. Although this syndrome exists along a clinical,  
65 anatomical, and pathological continuum with svPPA, patients present with progressive behavioral  
66 changes. To facilitate early identification and care in clinical and research settings, we propose  
67 specific diagnostic criteria and the term "emotional semantic variant frontotemporal dementia" to  
68 distinguish this syndrome from other forms of frontotemporal dementia.

69

70

71

72

73

## 74 **Introduction**

75 The term “frontotemporal dementia” (FTD) was introduced to encapsulate the progressive  
76 personality changes, social conduct impairment, and language deficits associated with atrophy of  
77 the frontal and temporal lobes.<sup>1</sup> Within FTD, behavioral symptoms often localize to frontal,  
78 temporal, insular, and striatopallidal regions in the right hemisphere, whereas language deficits  
79 typically localize to structures in the left.<sup>2</sup> Currently, the behavioral syndrome associated with  
80 FTD is referred to as “behavioral variant frontotemporal dementia” (bvFTD), and the language  
81 syndromes are brought together under the term “primary progressive aphasia” (PPA).

82  
83 The syndromes that target the anterior temporal lobe (ATL) are often initially asymmetric, with  
84 focal atrophy targeting either the right ATL (rATL) or left ATL (lATL),<sup>4,5</sup> and thus have distinct  
85 early clinical presentations. Patients with lATL-predominant atrophy typically have notable  
86 language deficits, which were well-represented in the consensus clinical criteria for semantic  
87 dementia and more recently for semantic variant PPA (svPPA).<sup>6,7</sup> Although these criteria do  
88 include semantic deficits for objects and faces, they primarily emphasize verbal semantic deficits  
89 that result in anomia, single word comprehension deficits, and object-identification impairments,  
90 and do not highlight socioemotional and behavioral deficits and thus overlooking the important  
91 symptoms resulting from rATL degeneration.

92  
93 Patients with focal atrophy of the rATL, exhibit prominent emotional changes and behavioral  
94 symptoms that can be hard to distinguish from those of bvFTD, and may not initially have  
95 significant aphasia symptoms.<sup>4,8–13</sup> Although in the early stages of disease, atrophy may be  
96 asymmetric and target the ATL unilaterally, over time the disease spreads to the contralateral  
97 hemisphere, and language and behavioral symptoms converge.<sup>4,13,14</sup> As both lATL- and rATL-  
98 predominant degeneration are typically associated with frontotemporal lobar degeneration -  
99 transactive response DNA binding protein 43 type C (FTLD-TDP type C) pathology,<sup>5</sup> lateralized  
100 ATL presentations are thought to reflect different manifestations of a single pathological  
101 continuum.<sup>4,15–19</sup> Studies that have investigated the clinical characteristics of rATL-predominant  
102 degeneration find that patients show difficulties recognizing familiar people and empathizing with  
103 others.<sup>4,11,20–22</sup> Diminished empathy—which can include lack of emotional responsiveness as well  
104 as decreased social connection and compassion—is often remarkable when disease targets the

105 rATL.<sup>11,23–26</sup> Neuroimaging studies have associated rATL atrophy with deficits in a wide range of  
106 socioemotional functions including empathy,<sup>23</sup> nonverbal social cue (e.g., sarcasm) detection,<sup>27</sup>  
107 and facial emotion recognition.<sup>28,29</sup> Feelings of familiarity that known others typically elicit may  
108 also rely preferentially on the rATL,<sup>28</sup> which suggests that even friends and family members may  
109 lose their affective significance to patients with rATL-predominant dysfunction.

110  
111 By integrating information from primary and association sensory and motor cortices, the ATLs are  
112 considered amodal hubs that represent all categories of semantic knowledge.<sup>15,18,30–34</sup> Though there  
113 is strong evidence for bilateral ATL contribution to semantic conceptual knowledge, specialization  
114 is hypothesized to appear as a result of divergent inputs from right and left hemispheres.<sup>19,35–38</sup>  
115 Whereas the lATL would bind verbal features into semantic conceptual knowledge through strong  
116 connections with linguistic networks, the rATL may be more centrally involved in representing  
117 nonverbal semantic knowledge through its prominent connections with right-sided socio-  
118 emotional networks.<sup>16,32,39,40</sup> According to this framework, lATL degeneration would disrupt  
119 verbal semantic knowledge, such as word comprehension and retrieval, and rATL degeneration  
120 would degrade nonverbal, socially-relevant semantic knowledge in individuals with typical  
121 hemispheric functional lateralization. Consistent with this hypothesis, nonverbal semantic  
122 knowledge tasks, including visual semantic associations;<sup>41</sup> identification of living beings (animals  
123 are recognized mainly by their visual features);<sup>39</sup> sound recognition;<sup>42</sup> and tactile,<sup>17</sup> olfactory,<sup>43</sup>  
124 and gustatory stimulus recognition have all been linked to rATL.<sup>44</sup> Importantly, nonverbal  
125 semantic processing is also necessary for the recognition and identification of familiar and famous  
126 people from faces and voices.<sup>28,42</sup> By extension, the rATL is also hypothesized to link emotion  
127 concepts with visual associations as well as non-verbal bodily changes (e.g., changes in autonomic  
128 nervous system functioning, motor activity, and experience), thus serving as the core hub for  
129 socioemotional semantic processing.<sup>31,45,46</sup> Although patients with rATL-predominant  
130 degeneration are often described as having “prosopagnosia,” this term does not fully capture the  
131 deficit, because patients cannot recognize familiar people from visual (face), linguistic (name), or  
132 auditory cues (voices), indicating a broader semantic deficit for biographical, person-specific  
133 semantic knowledge.<sup>47</sup> This lateralized specialization is observed in individuals known to have  
134 left-brain language dominance, non-right-handed patients can present with reverse  
135 symptomatology if they have reversed hemispheric dominance.<sup>25,48</sup>

136

137 Despite these advances in theoretical understanding of right and left ATL functions, studies  
138 systematically testing both semantics and socioemotional functions in large well-characterized  
139 cohort of patients are still lacking. Furthermore, there is no consensus on a set of diagnostic criteria  
140 for the rATL-predominant syndrome, and patient symptomatology has not been clearly linked to  
141 theoretical cognitive models. Patients with rATL-predominant atrophy pose a nosologic challenge  
142 as they can have symptoms that overlap with the diagnostic criteria for svPPA and semantic  
143 dementia,<sup>6,49</sup> which emphasize verbal semantic deficits, and bvFTD, which focus on behavioral  
144 and emotional features.<sup>50</sup> Lacking formal nomenclature or diagnostic criteria, patients with rATL-  
145 predominant degeneration are described with terms such as right temporal svPPA, right temporal  
146 semantic dementia, right temporal bvFTD, and right temporal variant FTD.<sup>4,8-10,47,51-53</sup> Because  
147 loss of empathy is often misinterpreted as a psychiatric symptom and because there are no clinical  
148 criteria for the rATL-predominant syndrome, these patients are often identified later in the disease  
149 course, when severe behavioral impairment often justifies a diagnosis of bvFTD. Furthermore, the  
150 current conflation of rATL-predominant and bvFTD syndromes may cause unnecessary confusion  
151 about patients' underlying neuropathology, which is much more heterogeneous in bvFTD, and  
152 thus will make the selection of a disease-modifying treatment more difficult for clinicians as  
153 pathology-specific drugs become common in the near future. Diagnostic criteria that would  
154 facilitate the early identification of rATL-predominant patients would also accelerate studies of  
155 nonverbal semantics and allow for the development of reliable measures that track these  
156 socioemotional changes in neurodegenerative illnesses.

157

158 The goal of the present study was to examine the clinical, neuropsychological, genetic, anatomical,  
159 and pathological characteristics of a large cohort of patients with rATL-predominant atrophy.  
160 Patients were studied within a multidisciplinary project on FTD-spectrum disorders that included  
161 comprehensive assessments of both language and socioemotional functioning. Based on the  
162 results, we propose new diagnostic criteria for a rATL-predominant syndrome that is on a  
163 continuum with, but qualitatively and quantitatively distinct from, both bvFTD and lATL-  
164 dominant svPPA syndromes as currently defined. To evaluate the validity of these criteria, we  
165 compared these rATL patients to those with frontal-predominant bvFTD and lATL-predominant  
166 svPPA, as determined by clinical and neuroimaging criteria. We hypothesized that patients with

167 rATL-predominant damage would have a specific pattern of early semantic memory loss for socio-  
168 emotionally relevant, non-verbal concepts, such as famous people and emotions, also resulting in  
169 typical behavioral symptoms such as loss of empathy. We expected that lack of empathy would be  
170 a prominent feature, and that other bvFTD behavioral symptoms (e.g., disinhibition, apathy/inertia,  
171 and lack of judgment/dysexecutive symptoms) would be less common. We also anticipated that  
172 patients with rATL-predominant degeneration would have some characteristic symptoms of  
173 svPPA (e.g., word comprehension and confrontational naming difficulties) but that these would be  
174 comparatively mild and would often not meet general PPA diagnostic criteria (i.e., aphasia as the  
175 most prominent early clinical feature and the principal cause of functional impairment).

176

## 177 **Materials and methods**

### 178 **Participants:**

179 We identified patients who met bvFTD and/or svPPA criteria (see below) and had research visits  
180 between 1998 and 2019 (n = 682) at the University of California, San Francisco (UCSF) Memory  
181 and Aging Center (MAC). As symptoms were often mild at early research visits, scores on the  
182 Clinical Dementia Rating scale (CDR) were not used when determining study inclusion.<sup>54</sup> Patients  
183 who did not have a brain MRI within one year of the first research evaluation were excluded (n =  
184 204). From the remaining 478 cases, we used structural neuroimaging measures to identify  
185 individuals with predominant rATL atrophy and relative preservation of the frontal lobes (see  
186 details below) (n = 46). We also included three other groups for comparison: a group of individuals  
187 with lATL-predominant atrophy and relative preservation of the frontal lobes (n = 75), a group of  
188 individuals with frontal-predominant atrophy and relative preservation of the rATL (n = 79), and  
189 a group of healthy older controls from the MAC Hillblom Healthy Aging Network (n = 59). We  
190 used strict clinical and anatomical inclusion criteria to contrast the rATL patients with these three  
191 groups and to clarify the distinct cognitive-behavioral phenotype of the rATL-predominant  
192 syndrome. Patients or caregivers provided informed consent following procedures aligned with  
193 the Declaration of Helsinki, and the study was approved by the UCSF Committee for Human  
194 Research.

195

### 196 **Diagnostic criteria:**



197 Two raters, a behavioral neurologist (KY) and a neuropsychologist (MM), reviewed all available  
198 medical data for the rATL-predominant patients to determine whether they met the following  
199 diagnostic criteria: 1) Neary-FTD,<sup>6</sup> 2) Neary-Semantic,<sup>6</sup> 3) bvFTD,<sup>50</sup> and 4) svPPA.<sup>49</sup> We also  
200 noted whether patients had semantic variant features (i.e., impaired confrontation naming and  
201 single-word comprehension) regardless of meeting PPA general criteria (i.e., aphasia is the most  
202 prominent deficit in early disease).<sup>49</sup> This allowed us to describe verbal semantic deficits in  
203 patients who had predominantly behavioral presentations. The two raters determined whether each  
204 of these criteria was met at three different time points: 1) within the first three years of disease  
205 onset, 2) at the first MAC research evaluation, and 3) in the years subsequent to the first MAC  
206 evaluation.

207

## 208 **Detailed symptom taxonomy and chronology:**

209 All research participants were evaluated by a behavioral neurologist, a neuropsychologist, a speech  
210 and language pathologist, and a nurse. A clinical history was obtained from each patient, with  
211 corroboration from the caregiver/informant, and began by identifying the nature and onset of the  
212 first symptoms. This was followed by a chronological history of how symptoms evolved, and then  
213 a detailed inventoried review of the domains of memory, language, executive function,  
214 visuospatial abilities, behavior, sleep, sensory processing, and motor function. Patients did not  
215 need to present for evaluation at the same stage of the disease in order for the retrospective  
216 interview to fully capture the chronology of symptoms.

217

218 We documented each patient's first five symptoms, rather than all symptoms ever noted, because  
219 we expected many of the canonical bvFTD symptoms (disinhibition, apathy, loss of empathy,  
220 compulsions, hyperorality, and executive deficits) and PPA symptoms (language and semantic  
221 impairment) would emerge for most people in the disease's later stages. In an effort to refine our  
222 categorization of the behavioral and emotional symptoms, we catalogued symptoms according to  
223 the following taxonomy:

- 224 1. Loss of empathy: Difficulty recognizing, understanding, or responding to others' emotions  
225 and needs; selfishness; emotional distance from others; reduced or inappropriate emotional  
226 expressivity, diminished social interest, interrelatedness, or personal warmth.

- 227 2. Words and object semantic loss: Loss of knowledge about words, facts, concepts, animate  
228 or inanimate objects, places, or landmarks. Patients may demonstrate impaired naming,  
229 diminished recall, poor identification, or reduced feelings of familiarity for these domains.
- 230 3. Person-specific semantic knowledge loss: Loss of knowledge about known faces, proper  
231 names, and people (including biographical information about famous people, close friends,  
232 and/or family members). Patients may demonstrate impaired naming, diminished recall,  
233 poor recognition, or reduced feelings of familiarity for these domains.
- 234 4. Complex compulsions and rigid thought process: Adhering to fixed schedules or roles,  
235 preoccupation with dogmas (e.g., hyper-religiosity) or health (hypochondriasis), restricted  
236 preference for certain colors, clothing, or diet, spending hours playing word games and  
237 puzzles.
- 238 5. Simple repetitive behaviors, hoarding, or obsessions: repetitive motor (e.g., clicking,  
239 tapping, pacing) or verbal stereotypies, hoarding, or preoccupation with objects or people.
- 240 6. Apathy/inertia: Cognitive (reduced planning and voluntary action), behavioral (reduced  
241 self-initiated thoughts and behaviors), and affective (reduced social, emotional, behavioral  
242 interest) forms of apathy.<sup>55</sup>
- 243 7. Disinhibition: Impulsivity or socially inappropriate behavior, loss of manners or decorum.
- 244 8. Lack of judgment/dysexecutive: Rash or careless actions, judgment mistakes that are out  
245 of character. Of note, in the current bvFTD criteria,<sup>49</sup> lack of judgment is considered as a  
246 part of disinhibition, but for this study we separated these two symptoms as they may be  
247 subserved by different neuroanatomical systems.<sup>56</sup>
- 248 8. Episodic memory loss: Difficulty remembering recent events and autobiographical  
249 information.
- 250 9. Hyperorality or dietary changes: Altered food preferences, binge eating, increased  
251 consumption of alcohol or cigarettes, oral exploration, or consumption of inedible objects.
- 252 10. Motor neuron disease signs: Bulbar and limb signs of motor neuron disease.
- 253 11. Other symptoms: Visuospatial difficulties, declined hygiene, loss of sexual desire, dietary  
254 changes (increased or decreased eating), weight gain, weight loss, hypersomnia, and  
255 insomnia. These symptoms are either common in other neurodegenerative illnesses or not  
256 specific for a single neurodegenerative disease.
- 257



## 258 **Functional, cognitive, and behavioral assessments:**

259 Patients underwent a comprehensive multidisciplinary assessment that included functional,  
260 neuropsychological, and socioemotional measures, Table 1 and Table 2, as previously  
261 described.<sup>11,57</sup> A description of the cognitive battery and further details about patients' performance  
262 are presented in the Supplementary material. Verbal semantic knowledge was evaluated with the  
263 Peabody Picture Vocabulary Test (PPVT; patients were asked to choose the picture that best  
264 describes a word),<sup>58</sup> the abbreviated 15-item Boston Naming Test (BNT; patients were asked to  
265 name different drawings),<sup>59</sup> and semantic verbal fluency (patients generated as many animals as  
266 possible in 60 seconds). Nonverbal semantic knowledge was tested with the picture version of the  
267 Pyramids and Palm Trees (PPT-P; patients matched semantically associated pictures).<sup>60</sup>

268 We assessed multiple domains of socioemotional functioning with a battery of task-based  
269 measures. Visual face perception was evaluated with the identity-matching subtest of the  
270 Comprehensive Affect Testing System (CATS), in which patients determined whether pairs of  
271 neutral faces were from the same person or different people.<sup>61</sup> The ability to label emotional facial  
272 expressions with words was tested with the CATS emotion identification task, in which patients  
273 chose the emotion term that matched the facial expression depicted in a photograph from a list of  
274 multiple choice options.<sup>62</sup> On the abbreviated version of the Emotion Evaluation Test (EET) from  
275 The Awareness of Social Inference Test (TASIT), patients identified the target emotion from a list  
276 of multiple choice options that were displayed by actors in short video clips. On the TASIT Social  
277 Inference–Minimal Test (SIM), patients were asked to detect sarcasm of actors in videos through  
278 interpretation of social cues including prosody, facial expression, and gesture. Theory of mind  
279 (ToM)—the ability to infer the thoughts, emotions, and intentions of others—was tested in  
280 cognitive (i.e., the ability to identify first and second order object knowledge of actors in videos)  
281 and emotional modalities (i.e., the ability to identify first and second order emotion knowledge of  
282 actors in videos) using the UCSF theory of mind Test.<sup>63</sup> Person-specific semantic knowledge was  
283 evaluated using the UCSF Famous Faces Naming test (a free response task in which patients  
284 named photographs of famous people's faces), Semantic Famous Face Association test (patients  
285 matched famous faces based on their professions), Semantic Famous Name Association test  
286 (patients matched written names of famous people based on their professions), and Semantic  
287 Famous Face Recognition test (patients chose the famous face among four faces)<sup>11,64</sup> Further  
288 socioemotional testing details are found in the Supplementary material.

289  
290 Informant-based measures were also obtained to assess patients' socioemotional behavior in  
291 everyday life. Informants rated patients' current cognitive empathy (i.e., perspective taking) and  
292 emotional empathy (i.e., empathic concern) using the Interpersonal Reactivity Index (IRI).<sup>65</sup>  
293 Sensitivity and responsiveness to others' subtle emotional expressions were rated by informants  
294 using the Revised Self-Monitoring Scale (RSMS).<sup>66</sup> Interpersonal coldness, warmth, and  
295 dominance, areas of personality known to be affected in FTD, were evaluated with informant  
296 ratings on the Interpersonal Adjective Scales (IAS).<sup>67</sup> Behavioral inhibition (i.e., behaviors  
297 associated with response avoidance and sensitivity to threat) and behavioral activation (i.e.,  
298 behaviors associated with approach motivation including reward responsiveness, drive, and fun-  
299 seeking) systems were evaluated with informant ratings on the Behavioral Inhibition  
300 System/Behavioral Activation System (BIS/BAS) questionnaire.<sup>68</sup>

301

### 302 **Structural neuroimaging analyses:**

303 We processed structural T1-weighted images, as previously described.<sup>69,70</sup> W-score maps (W-  
304 maps) were generated by comparing each patient's gray matter maps to 534 neurologically healthy  
305 older controls from the MAC Hillblom Healthy Aging Network (age range 44-99 years,  $M \pm SD$ :  
306  $68.7 \pm 9.1$ ; 220 male/302 female), adjusted for age, sex, total intracranial volume, and magnet field  
307 strength. Mean W-score values were extracted for each region of interest (ROI) in the probabilistic  
308 Desikan atlas. W-scores have a mean value of 0 and a standard deviation (SD) of 1; values of +1.65  
309 and -1.65 correspond to the 95th and 5th percentiles and indicate regions with larger and smaller  
310 gray matter volume compared to the normative sample, respectively.

311

312 Patients were included in the rATL-predominant degeneration group if their lowest three W-scores  
313 were in right temporal regions, and they had relative preservations of the frontal lobes based on an  
314 atrophy index described as follows. For each patient with rATL maximum atrophy, we calculated  
315 the mean W-score of all frontal lobe ROIs and the mean W-score of all right temporal ROIs and  
316 computed a proportion with the following index: *right temporal index* = *mean whole frontal w-*  
317 *score/mean right temporal w-score*. The rATL-predominant degeneration patients who had an  
318 index < 0.50 were included in this study (n = 46) (Fig. 2 and Supplementary Table 1). A similar  
319 approach was used to select the comparison groups. Patients were included in the frontal-

320 predominant group if their lowest three W-scores were in the frontal regions, and they had relative  
321 preservation of the right temporal regions based on an atrophy index (mean frontal W-map score /  
322 mean right temporal W-map score > 0.50). Patients were included in the lATL-predominant group  
323 if their lowest three W-map scores were in the left temporal regions, and they had relative  
324 preservation of the frontal lobes based on atrophy index (mean frontal W-map score / mean left  
325 temporal W-map score < 0.50). We implemented this index for the lATL instead of a right / left  
326 temporal laterality index in order to match the rATL and lATL patients based on their degree of  
327 accompanying frontal involvement.

328  
329 Patients were excluded if they did not meet either the predominant atrophy or the atrophy index  
330 requirements. Patients were excluded if their lowest W-scores were not in the rATL, frontal lobe,  
331 or lATL (n = 164; four cerebellar, 65 mixed (i.e., lowest three W-scores were in different lobes),  
332 62 subcortical, and 33 posterior (i.e., parietal or occipital lobes)), or if their greatest atrophy was  
333 in the rATL, lATL, or frontal lobes but did not meet the atrophy index inclusion threshold (total n  
334 = 114; 41 with maximum atrophy in rATL but frontal / right temporal > 0.5, 29 with maximum  
335 atrophy in the frontal lobe but frontal / right temporal < 0.5, and 44 with maximum atrophy in the  
336 lATL but frontal / left temporal > 0.5).

337  
338 Recognizing that each of the groups included in this study did not show atrophy merely in one  
339 isolated brain region (for instance, patients typically have bilateral ATL volume loss by the time  
340 they present for imaging evaluation), we qualify our descriptions by using the term “predominant”  
341 to refer to the patient group with maximum atrophy in the one region that is out of proportion to  
342 the other regions. Thus, we acknowledge that the brain atrophy pattern of our “rATL-predominant”  
343 group also includes frontal and left temporal regions to varying degrees, but these patients  
344 unequivocally present with maximum atrophy in the rATL. Similarly, the “lATL-predominant”  
345 refers to the patient group with maximum atrophy in the lATL that is out of proportion to the  
346 frontal and rATL atrophy. The term “frontal-predominant”, likewise, is used to refer to the patient  
347 group with maximum atrophy in the frontal lobes that is out of proportion to the ATL atrophy. The  
348 atrophy of each group as shown in Figure 2 extends beyond the regions of maximum atrophy and  
349 as such symptoms could be due to atrophy in the other regions involved or multiple parts of the  
350 connected networks”

## 351 **Genetic and neuropathological data:**

352 Participants were screened for the following genetic mutations: *PGRN*, *MAPT*, *TARDBP*, *C9orf72*,  
353 *APP*, *PSEN1*, *PSEN2*, *FUS*, and *APOE*. In the patients who underwent autopsy, brains were  
354 processed and analyzed according to the UCSF Neurodegenerative Disease Brain Bank protocol.<sup>71</sup>  
355 In short, eight micro-thick formalin-fixed paraffin-embedded tissue sections from 23 tissue blocks  
356 were cut to represent 27 regions of interest. All blocks underwent routine hematoxylin and eosin  
357 staining, and subsets underwent immunohistochemistry for hyperphosphorylated tau, amyloid- $\beta$ ,  
358 TDP-43, alpha-synuclein, and 3R-tau antibodies. Neuropathological diagnoses were based on  
359 consensus criteria.<sup>72-74</sup>

360

## 361 **Statistical analysis:**

362 Tests of normality for all continuous data were conducted with the Shapiro-Wilk test.  
363 Homogeneity of variance was tested by Levene's test. Statistical differences in the frequency of  
364 categorical variables across groups such as clinical symptoms and APOE genotype were  
365 performed with the Chi-Square test. Means of demographic measures (Table 1) were compared  
366 across groups with the ANOVA test. Means of functional, neuropsychological, language, and  
367 socioemotional measures (Tables 1 and Table 2) were compared with the ANCOVA test correcting  
368 for age, sex, and disease severity as measured by the Mini-Mental State Exam (MMSE). Because  
369 of the unequal sample sizes and unequal group variances, pairwise post hoc comparisons were  
370 done with estimated marginal means and Bonferroni-Sidak adjusted probabilities to correct for  
371 multiple comparisons, with  $p < 0.05$  set as the threshold for statistical significance. Data analysis  
372 was performed with SPSS (version 27, SPSS/IBM, Chicago, IL). Table 1 and Table 2 show  
373 estimated marginal means, standard errors, and statistical significance after correcting for age, sex,  
374 and disease severity as measured by MMSE. When using ANCOVA and estimated marginal  
375 means for post hoc between groups analysis, the individual datapoints cannot be graphically  
376 plotted, for visualization purposes we show in Figure 4 the uncorrected datapoints, means, and  
377 standard deviations for key socioemotional measures.

## 378 **Data availability:**

379 The data for this study is available upon request. The sensitive nature of patients' data and the  
380 institutional ethics protocols in place at the time these patients gave informed consent do not permit  
381 open data sharing. The clinical and neuroimaging data used in the current paper are available from  
382 the senior author (MLGT), upon formal request indicating name and affiliation of the researcher  
383 as well as a brief description of the use that will be done of the data. All requests will undergo  
384 UCSF-regulated procedure thus requiring submission of a Material Transfer Agreement (MTA).  
385 No commercial use would be approved.

386

## 387 **Results**

### 388 **Demographic features:**

389 Table 1 shows the demographic information. Although the sex distribution was not different  
390 between healthy control and the patient groups, the healthy controls were older than all of the  
391 patient groups. Patients in all cohorts were highly educated with an average over 15.5 years of  
392 education. In the rATL-predominant group, 91% were White and 9% were Asians, a proportion  
393 that was not different from other groups. In the rATL cohort (n = 46), the average age of onset  
394 (60.2 years and sd = 6.8 years). In the rATL-predominant group, 52% of the patients were men  
395 and 15% were non-right-handed. On average, rATL-predominant patients were in the mild to  
396 moderate range of disease severity; at the first research visit, the average MMSE score (25.7/30;  
397 sd = 5.2) was higher than the other disease groups. The CDR for the rATL group (average score  
398 0.9/3; sd = 0.5) was lower than the lATL-predominant group but not different from the frontal-  
399 predominant group. We used age, sex, and MMSE as confounds in all later analyses.

400

### 401 **Diagnostic criteria and clinical symptom chronology:**

402 During the first three years of the illness, only a minority of patients in the rATL-predominant  
403 group met diagnostic criteria for Neary-FTD (13%), Neary-semantic dementia (9%), bvFTD  
404 (27%), or svPPA (13%). Approximately one third of the group had verbal svPPA features (i.e.,  
405 impaired confrontational naming and object knowledge) but did not meet the general criteria for  
406 PPA (36%) because aphasia was not the initial and predominant symptom. At the time of the first  
407 research evaluation at the MAC (average 5.3 years after disease onset), these percentages were

408 higher: Neary-FTD (52%), Neary- semantic dementia (11%), bvFTD (83%), svPPA (16%), and  
409 semantic variant features (78%) (Supplemental Table 2).

410  
411 The clinical histories revealed that, when combining all symptoms that emerged during the first  
412 three years of the illness, the most common symptoms for patients with rATL-predominant  
413 degeneration were loss of empathy (27%), loss of person-specific semantic knowledge (23%),  
414 complex compulsions and rigid thought process (18%), and loss of verbal semantic knowledge  
415 (13%) (Fig. 3). The sequence of the first two symptoms in rATL-predominant patients is shown in  
416 Supplemental table 3.

417  
418 Caregiver-reported examples of loss of empathy included decline in the ability to understand and  
419 respond to others' emotions and needs (e.g., not consoling a family member who lost a parent or  
420 was diagnosed with a terminal illness, making tactless comments in a funeral, asking a crying child  
421 why their eyes were watering, and becoming more self-centered). In our experience, often, loss of  
422 empathy toward others can be interpreted by caregivers as selfishness. Examples of loss of person-  
423 specific semantic knowledge included not recognizing familiar people by the face or voice, not  
424 recalling biographical information of a famous person, and not knowing patients' own relationship  
425 to familiar people. Examples of complex compulsions and rigid thought process included  
426 adherence to rigid time schedules; dogmatism; hypergraphia; hypochondriasis; restricted color,  
427 clothing, diet, game, or puzzle preferences. Less commonly, patients exhibited simple repetitive  
428 motor or speech behaviors or hoarding behaviors. Examples of loss of verbal semantic knowledge  
429 included difficulty understanding word meaning or recognizing objects.

430  
431 When rATL-predominant patients had both person-specific and verbal semantic knowledge loss  
432 (32 patients [69%]), the person-specific semantic knowledge symptoms were reported to precede  
433 the verbal semantic complaints in 24 patients (75%). Five patients (10%) had person-specific  
434 semantic knowledge symptoms without verbal semantic complaints, and six patients (14%) had  
435 verbal semantic complaints without person-specific semantic knowledge complaints. Only three  
436 patients (6%) had neither person-specific nor verbal semantic knowledge complaints.

437



438 While these initial symptoms in the rATL-predominant group emerged within the first three years  
439 of disease onset, additional symptoms (fifth, sixth, and beyond) arose as the disease progressed.  
440 Four years after disease onset, common symptoms included apathy and disinhibition. For these  
441 two symptoms, differences in reporting created ambiguity. Apathy was explicitly documented in  
442 the medical history as a clinical complaint of 11 patients, whereas on the NPI (Supplementary  
443 Table 5), apathy was noted in 39 patients, indicating a discrepancy between what caregivers report  
444 during the interview with the behavioral neurologist and when answering the NPI questions.  
445 Interestingly, the item of apathy on the NPI appeared mainly in the context of affective apathy  
446 questions rather than cognitive inertia or autoactivation/behavioral apathy and thus these behaviors  
447 could also be interpreted as loss of empathy. This potentially explains the discrepancy between  
448 clinical history and NPI with regards to apathy reporting and highlights the need for incorporating  
449 loss of empathy questions into the NPI. On history, disinhibition was reported in 23 patients,  
450 whereas on the NPI it was coded in 36 patients. In the majority of patients, disinhibition appeared  
451 as insensitivity to social context rather than as an impulse-control deficit, for instance making  
452 funny comments in a funeral rather than approaching strangers or engaging in dangerous activities.  
453 By history, episodic memory impairment, executive symptoms, dietary changes, motor neuron  
454 disease, and problems navigating were less frequent and happened later in the disease course. With  
455 regards to the less commonly reported symptoms in the rATL-predominant group, five patients  
456 (11%) had loss of sexual desire, two as an early symptom. Irritability was reported in eight patients  
457 (17%) and as an early symptom only in three patients (6%). Increased eating (7 patients, 8%) did  
458 not reach the degree of binge eating, oral exploration or consumption of inedible objects. Sleep  
459 changes, increased or decreased sleep, happened in five cases (10%), three of which were in the  
460 first year of disease onset.

461  
462 In comparison, the early symptoms in the frontal-predominant group were lack of  
463 judgment/dysexecutive symptoms (24%), apathy (21%), and disinhibition (17%), as shown in Fig  
464 3 and Supplementary Table 4. In the lATL-predominant patients, the early symptoms were verbal  
465 semantic knowledge loss (36%), person-specific knowledge deficits (16%), and rigid thought  
466 process (18%). Loss of empathy occurred significantly more often in rATL- compared to frontal-  
467 and lATL-predominant patients ( $\chi^2 = 22, p <.001$  and  $11.2 p <.001$ , respectively). Deficits in  
468 person-specific knowledge were significantly more common in rATL- than frontal-predominant

469 patients ( $\chi^2 = 56.1, p < .001$ ) but not lATL-predominant patients ( $\chi^2 = 3.32, p < .68$ ). Similarly,  
470 complex compulsions and rigid thought process was significantly more frequent in rATL-  
471 compared to frontal-, but not lATL-predominant groups ( $\chi^2 = 19.54, p < .001$  and  $\chi^2 = 1.03, p =$   
472  $0.3$ , respectively). In contrast apathy, disinhibition, and lack of judgment/dysexecutive symptoms  
473 were significantly more common in frontal- than rATL- and lATL-predominant patients ( $\chi^2 = 11.5,$   
474  $p < .001, \chi^2 = 5.2, p < .02, \chi^2 = 18.8, p < .001$ , respectively).

## 475 **Functional, cognitive, and behavioral results:**

476 Table 1, Table 2, and Figure 4 show the neuropsychological and socioemotional results.  
477 Neuropsychological testing demonstrated that, at presentation to the MAC, patients with rATL-  
478 predominant degeneration had severe impairment in both verbal semantic knowledge (on the BNT  
479 and PPVT) and nonverbal (visual) semantic knowledge (on the PPT-P). They also had deficits in  
480 verbal fluency, with more significant impairment in semantic than in lexical fluency, and on tests  
481 of executive functioning. Episodic memory was impaired, and visuospatial processing was intact.  
482

483 On tests of socioemotional functioning, rATL-predominant degeneration patients had severe  
484 deficits in multiple domains. On the CATS, a static face perception test, although they had no  
485 difficulty with face identity-matching, their emotion labeling was impaired, suggesting a deficit in  
486 emotion recognition. Patients also had difficulty labeling the emotions of others in videos (TASIT-  
487 EET) and understanding paralinguistic cues (TASIT-SIM-M). On tests of Theory of Mind, patients  
488 had normal cognitive theory of mind scores but impaired emotional theory of mind scores,  
489 indicating poor comprehension of others' emotional, but not cognitive, states. On the Famous  
490 Faces test, rATL-predominant degeneration patients could not identify the faces, names, or  
491 occupations, of famous people, indicating loss of person-specific semantic knowledge rather than  
492 prosopagnosia. On informant-based measures, rATL degeneration patients had abnormal scores  
493 on multiple measures of behavior and personality. Patients had very low emotional empathy (IRI  
494 Empathic Concern), cognitive empathy (IRI Perspective Taking) and socioemotional sensitivity  
495 (RSMS). On a personality inventory (IAS), informants rated patients as having low levels of  
496 interpersonal warmth and increased interpersonal coldness yet preserved interpersonal dominance.  
497

498 Although emotion processing was disrupted in frontal-, rATL-, and, to a lesser degree, lATL-  
499 predominant patients (as measured by IRI-ET, IRI-PT, and RSMS), the groups differed in their

500 specific constellations of social and behavioral deficits. While the frontal-predominant patients  
501 were impaired on both cognitive and emotional measures, the rATL- and lATL-predominant  
502 patients generally showed prominent deficits on the emotional, but not the cognitive, components  
503 of socioemotional tasks. Specifically, rATL- and lATL-predominant patients showed preserved  
504 cognitive theory of mind but impaired emotional theory of mind, whereas frontal-predominant  
505 patients showed impairment on both cognitive and emotional theory of mind (Figure 4 and Table  
506 2). Similarly, rATL-predominant patients scored within normal limits, on the TASIT-Sincere task  
507 (a cognitive control task that assesses simple comprehension) but below expectations on the  
508 TASIT – EET (an emotion naming task) and the TASIT – Simple Sarcasm subscale (a test of  
509 paralinguistic cue detection). In contrast, the frontal-predominant group scored below expectations  
510 on all three TASIT subsets, suggesting both emotional and cognitive deficits. On informant-based  
511 personality measures, the rATL-predominant patients showed increased coldness but preserved  
512 dominance, whereas the frontal-predominant patients showed increased coldness (to a lesser  
513 degree than rATL-predominant patients) but reduced dominance. Furthermore, rATL-predominant  
514 patients showed reduction in both their activation and inhibition systems on the BIS/BAS. Reduced  
515 reward sensitivity was associated with reduced drive and fun-seeking in rATL-predominant  
516 patients, whereas in the frontal-predominant patients reduced reward sensitivity was associated  
517 with higher drive and fun-seeking (Fig 4, Table 2). This incongruence in the frontal-predominant  
518 group is consistent with the higher rates of impulsivity, such as making sexual comments, in this  
519 group as shown on the NPI (Supplemental table 5).

520  
521 With regard to face processing and person-specific knowledge, while all disease groups had  
522 difficulty with Famous Faces Naming, only rATL-predominant patients (and to a lesser degree  
523 lATL-predominant patients) had impaired scores on the Famous Faces Familiarity and Semantic  
524 Association tests (Figure 4 and Table 2). On the CATS Face and Affect Matching, whereas the  
525 frontal-predominant patients were impaired on both tests, the rATL-predominant patients had  
526 preserved face matching but impaired affect matching. The lATL-predominant patients, in  
527 contrast, had intact scores on the Face and Affect Matching tests (Figure 4 and Table 2). The  
528 deficits in the rATL group did not appear to be due to broader deficits in visuospatial functioning  
529 as only the frontal-predominant patients demonstrated deficits in this area (Benson Figure Copy  
530 and Visual Object and Space Perception).

531  
532 With regard to verbal semantics, both rATL- and lATL-predominant patients had greater deficits  
533 on the BNT than the frontal-predominant group. On episodic memory testing, rATL- and lATL-  
534 predominant patients showed worse verbal and visual memory impairment compared to the  
535 frontal-predominant group (Fig 4 and Table 2). On executive function tests, rATL- and lATL-  
536 predominant patients showed better executive function performance compared to the frontal-  
537 predominant group (Fig 4 and Table 1).

538

### 539 **Genetic and pathology results:**

540 Pathology and genetic results are presented in Tables 3 and 4. Only two of the rATL-predominant  
541 patients had a genetic mutation, (one had a *MAPT* mutation, and one had a possibly pathogenic  
542 *TARDBP* mutation). Seventeen of the frontal-predominant patients (14 *C9orf72* and three *GRN*)  
543 and five lATL-predominant patients (three *MAPT* and two *C9orf72*) had genetic mutations. *APOE*  
544 data were available in 40 of the rATL-predominant patients (55% E3/E3; 22% E3/E4; 18% E2/E3).  
545 No differences in *APOE* genotypes were found between subgroups with available *APOE data*  
546 (Supplementary table 7).

547 See Table 3 and Supplementary Table 6 for the pathology results. Most of the rATL-predominant  
548 patients with available autopsy data had FTLN-TDP type C pathology (68%). When considering  
549 all types of FTLN-TDP cases, regardless of the neuropathological subtype, the percentage  
550 increased (84%). Three patients had FTLN-tau (two FTLN-tau Pick's type, and one patient had  
551 FTLN-tau unclassifiable 4R tauopathy). In the rATL-predominant group with autopsy data, three  
552 patients did not have loss of semantic knowledge on either history or testing, and, interestingly,  
553 none of these three cases had FTLN-TDP type C (two had FTLN-tau Pick's type, and one had  
554 FTLN-TDP type B). In the lATL-predominant group, there was also large proportion of patients  
555 with TDP-43 pathology, in general, and TDP-43 type C, specifically. This is in contrast to the  
556 frontal-predominant group, which showed more heterogeneity in its underlying pathology (51%  
557 tauopathy, 22% FTLN-TDP type B, 12% FTLN-TDP type A, and 2% FTLN-TDP type C) (Table  
558 3).

559

### 560 **Sensitivity and specificity of the proposed diagnostic criteria:**

561 Based on the most common early symptoms in the patients with rATL-predominant degeneration,  
562 here we propose a new set of diagnostic criteria for this syndrome (Table 4). To test the sensitivity  
563 and specificity of these criteria, we contrasted the rATL- and frontal-predominant patients  
564 (Supplementary Table 8), groups that are often difficult to disentangle clinically. To avoid  
565 circularity, we did not calculate sensitivity or specificity values based on the neuroimaging data  
566 because our groups were anatomically defined.<sup>31,75</sup> In the first three years of the illness, the criteria  
567 differentiated the rATL-predominant from the frontal-predominant group with a sensitivity of  
568 81.3% and a specificity of 84.2%. The sensitivity increased to 86.0% at the time of the first clinical  
569 visit and to 93.0% when considering symptoms across all visits. The specificity was 82.8% at the  
570 first clinical visit and 81.4% when considering all visits. We predict that sensitivity and specificity  
571 will increase in prospectively collected samples because of the increased probing of nonverbal  
572 socioemotional semantics during patient evaluations, and should improve further with the  
573 inclusion of patients' neuroimaging information.

574  
575 The differential diagnosis of rATL- from lATL-predominant patients is somewhat less difficult in  
576 clinical practice, in part because all lATL patients show early word-finding and word-  
577 comprehension deficits instead of early behavioral symptoms, and thus are easily classified as  
578 having a PPA syndrome. As the disease progresses and neurodegeneration spreads to the rATL  
579 and orbitofrontal regions,<sup>4,13,14</sup> however, the continuum between the two clinical presentations  
580 becomes more obvious, as predicted by the same FTLT-DTP pathology. Consistent with this, the  
581 proposed criteria showed 76.0% sensitivity and 87.0% specificity in distinguishing rATL- from  
582 lATL-predominant patients in the first two years of symptoms and 81.3% sensitivity and 68.2%  
583 specificity by the third year. The decrease in specificity by the third year highlights the overlap in  
584 disease progression between rATL and lATL degeneration.

585

## 586 **Discussion**

587 Here, we present the symptom chronology, neuropsychology, and socioemotional features of a  
588 large cohort of well-characterized patients with predominant rATL degeneration. These patients  
589 demonstrated early loss of person-specific semantic knowledge (i.e., mainly face-based, nonverbal  
590 semantic knowledge) and empathy as well as complex compulsions and rigid thought process,  
591 while later they showed loss of verbal semantic knowledge and eventually apathy and

592 disinhibition. Cognitive and anatomical data showed that rATL-predominant degeneration disrupts  
593 the neural representations sustaining mainly nonverbal semantic knowledge for socioemotional  
594 concepts, resulting in early, prominent deficits in empathy, people recognition, and social  
595 behavior. This constellation of symptoms reflects dysfunction in underlying neuroanatomical  
596 systems that are anchored to the rATL and that overlap with, but are dissociable from, those  
597 involved in frontal-predominant bvFTD and lATL-predominant svPPA.<sup>76,77</sup> As such, this  
598 syndrome necessitates a distinct nomenclature, which herein we refer to as “emotional semantic  
599 variant frontotemporal dementia” (esvFTD), a term that reflects the continuum with the semantic  
600 variant PPA (and its original semantic dementia), while highlighting socioemotional cognition and  
601 behavior, and not aphasia, as the most common first symptom. The neuropathological etiology of  
602 this clinico-anatomical syndrome is usually FTLN-TDP disease, and most often FTLN-TDP type  
603 C. The intention of using this name is to describe both the behavioral and cognitive symptoms of  
604 this syndrome rather than use an anatomical label, such as in “right temporal variant,” which may  
605 also be inaccurate in non-right-handed individuals. In these clinical criteria, loss of nonverbal  
606 socioemotional semantic knowledge is the central deficit (Table 4). The core features include loss  
607 of empathy, difficulty identifying and naming known people, and complex compulsions or rigid  
608 thought process. Supportive features include object naming difficulties, spared visuospatial  
609 functions, and preserved speech production (motor speech and phonology). A diagnosis of  
610 probable esvFTD also requires neuroimaging evidence of disproportionate rATL atrophy or  
611 hypometabolism. The novel diagnostic classification proposed here help identify symptoms that  
612 are most specifically associated with rATL degeneration. Although the socioemotional evaluations  
613 sensitive to FTD can be complicated by the cognitive difficulties,<sup>78</sup> this study suggests that  
614 including certain measures such as Famous Faces, CATS, PPVT, PPT-P, emotional and cognitive  
615 Theory of Mind, IAS-Coldness, and TASIT in the assessment of patients presenting with  
616 behavioral and language symptoms is useful in diagnosing patients with esvFTD.

617  
618 As the rATL is a key hub in socioemotional semantic knowledge—the sensorimotor activities,  
619 visceral changes, and subjective experiences that are bound into multimodal concepts,<sup>31,45</sup> we  
620 expected that patients with rATL-predominant degeneration would have core deficits in person-  
621 specific knowledge. Socioemotional semantic deficits would interfere with their ability to  
622 recognize familiar others, attribute meaning to their emotional expressions, and respond



623 appropriately in social contexts.<sup>4,10,11,13,23</sup> Identification of known people from their face or voice  
624 requires person-specific semantic knowledge that incorporates visual and auditory information  
625 about what they look and sound like with biographical information about who they are and how  
626 they relate to the observer. Consistent with our hypotheses, patients with rATL-predominant  
627 degeneration displayed severe impairment on the Famous Faces Naming, Semantic Association,  
628 and Familiarity tasks, a pattern consistent with previous reports.<sup>20</sup> These deficits differed from  
629 classical prosopagnosia, the visual inability to recognize familiar people from their faces only, as  
630 the patients with rATL-predominant degeneration were also unable to recognize familiar others  
631 from their face, name, voice, biography, or information about their relationship to the patient.<sup>28,42</sup>

632  
633 Loss of empathy was another hallmark feature of patients with rATL-predominant degeneration.  
634 Informants who had been close to the patient before disease onset also reported loss of cognitive  
635 and emotional empathy, lack of responsiveness to others' emotional expressions, and increased  
636 interpersonal coldness (despite preserved interpersonal dominance, a personality profile that  
637 distinguished them from the lATL- and frontal-predominant groups). On socioemotional testing,  
638 patients with rATL-predominant degeneration had difficulty selecting a label for facial emotional  
639 expressions on the CATS emotion identification task, despite preserved face perception on CATS  
640 face identity-matching. This pattern differed from the frontal-predominant group who exhibited  
641 impaired performance on both subtasks, and the lATL-predominant group who showed no  
642 impairment on both subtasks. Understanding others' feelings also requires semantic knowledge  
643 about nonverbal stimuli (tone of voice, body position, facial expression) as well as access to  
644 autonomic, bodily cues that foster vicarious experience of others' internal states.<sup>79,80</sup>

645  
646 These findings suggest patients with rATL-predominant degeneration have impaired  
647 understanding of the semantics of observed facial expressions and are consistent with literature  
648 showing disrupted face processing in both lATL- and rATL-predominant patients.<sup>81</sup> Patients with  
649 rATL-predominant degeneration also had difficulty labeling emotions in videos of socioemotional  
650 scenarios in the TASIT-EET. Although the videos included facial, prosodic, postural, and gestural  
651 emotional cues, patients with rATL-predominant degeneration performed poorly on this task,  
652 suggesting a multimodal nonverbal loss of emotional cue comprehension. Moreover, patients with  
653 rATL-predominant degeneration were impaired at interpreting videos that tested emotional Theory

654 of Mind, despite the fact that the emotions of the characters were explicitly verbally labeled for  
655 them throughout the task. Of note is that patients had no trouble interpreting cognitive Theory of  
656 Mind videos that relied on perspective-taking focused on physical objects rather than on others'  
657 changing emotions. This was in contrast to the frontal-predominant group, who demonstrated  
658 impairment on both the cognitive as well as the emotional tasks. Taken together, these findings  
659 suggest that rATL-predominant patients' deficits were due to problems understanding emotions,  
660 rather than a result of task-specific non-emotional cognitive demands, and showed that their  
661 emotion comprehension deficits extend deeper than the retrieval of the name of the emotion.

662  
663 rATL- and lATL-predominant atrophy patients commonly exhibited complex, goal-oriented, and  
664 time-consuming behaviors and cognitive rigidity. Frontal-predominant patients, however, showed  
665 more simple motor repetitive behaviors, hoarding, and obsessions. Compulsive behaviors in  
666 bvFTD commonly include aberrant motor behaviors such as tapping and pacing, hoarding,  
667 and echolalia and localize to frontal subcortical networks and left lateral temporal lobe.<sup>82,83</sup>  
668 Whereas more complex compulsions such as preoccupation with certain ideas or activities,  
669 following fixed schedules, parsimony, and complex rituals were shown to localize to the rATL.<sup>84</sup>  
670 Consistently, our rATL patients most commonly exhibited complex, goal-oriented, and time  
671 consuming behaviors and rigid thought process.

672  
673 In the later phases of disease, patients with rATL- and lATL-predominant degeneration also  
674 exhibited apathy and disinhibition, symptoms that are cardinal features of bvFTD. In the frontal-  
675 predominant group, conversely, apathy, disinhibition, and poor judgment/dysexecutive symptoms  
676 were the most common early symptoms. This suggests that the early symptoms can help  
677 distinguish temporal- from frontal-predominant FTD. In FTD, apathy can reflect underlying  
678 deficits in cognitive, behavioral, or affective systems that are anchored by the frontal lobes.<sup>55</sup>  
679 Disinhibition in FTD can refer to behaviors that reflect a lack of impulse control, imbalanced  
680 reward and punishment systems, executive dysfunction, lack of disgust, or difficulty understanding  
681 emotional contexts.<sup>85</sup> The clinical histories of rATL-predominant patients in our cohort suggested  
682 that symptoms recorded as apathy and disinhibition differed from typical examples reported in the  
683 frontal-predominant group and commonly known for bvFTD. For instance, lack of participation  
684 in activities with family or making tactless comments were due to socioemotional semantic deficits

685 rather than apathy or impaired impulse control. By history, the rATL-predominant degeneration  
686 patients had early loss of interest in friends and family, were less affectionate, and made tactless  
687 comments indicating a disregard for the social context but did not show deficits in impulse control  
688 until after year four of illness.

689  
690 Early semantic dementia descriptions focused on the prominent verbal semantic deficits resulting  
691 primarily from lATL damage,<sup>6,86,87</sup> the recent use of more comprehensive neuropsychological  
692 batteries has yielded data clearly delineating the socioemotional semantic impairments that  
693 predominate in the setting of rATL degeneration. The homogeneous pathology in esvFTD patients  
694 emphasizes the clinical importance of separating this group from the more pathologically  
695 heterogeneous bvFTD, while placing it on a continuum with its svPPA counterpart. esvFTD  
696 (behavioral syndrome) and svPPA (language syndrome) are the two extremes of the semantic  
697 dementia continuum. Recognizing both the behavioral and linguistic challenges linked to focal  
698 ATL atrophy is important to isolate this relatively homogeneous clinico-anatomical-pathological  
699 syndrome from the more pathophysiologically heterogeneous frontal presentations. Consistent  
700 with studies that showed emotional deficit in svPPA,<sup>16,88</sup> our findings highlight that socioemotional  
701 changes are present in lATL-predominant patients, although they are not the main complaint and  
702 are less prominent than in rATL (see Figure 3). Given the common but graded symptomatology  
703 between rATL- and lATL-predominant patients, the proposed criteria can be considered an  
704 extension of the svPPA definition and refinement of the original semantic dementia description.  
705 As disease progresses, the left and right presentations will often merge, and most patients will  
706 develop both language and comporment difficulties. The symmetry between lATL and rATL  
707 degeneration is likely not a perfect mirror image, however, as one longitudinal study indicated that  
708 while lATL patients demonstrated progressive atrophy in the rATL, rATL patients showed further  
709 atrophy in right hemisphere regions including orbitofrontal cortex and anterior cingulate cortex.<sup>13</sup>  
710 Stronger functional connectivity between the ATL and orbitofrontal regions in the right  
711 hemisphere has been found in healthy individuals, which may help to explain these different  
712 effects.<sup>89</sup> While the challenge of mapping the clinical and pathological continua across all FTD-  
713 spectrum disorders is well-known and accepted,<sup>75,90-93</sup> clear diagnostic algorithms are needed to  
714 improve early diagnosis, pathological prediction and specialized care and treatment.

715

716 The high frequency of the first two symptoms in the rATL-predominant cohort (loss of empathy  
717 and person-specific semantic knowledge) and the deficits on both facial emotion identification and  
718 famous faces suggest that the regions subserving face and emotion processing are interlinked and  
719 possibly undergo interdependent development during maturation and concordant decay during  
720 neurodegeneration. Neurodevelopmentally, the ability to acquire and respond to social and  
721 emotional concepts is shown to be linked to accurate interpretation of emotional expressions  
722 during early childhood. In fact, recognition of emotional facial expressions is a fundamental aspect  
723 of human behavioral neurodevelopment, as infants prefer to look at faces from a very early age,  
724 and regulate their actions based on maternal emotional facial expressions.<sup>94</sup> Furthermore,  
725 impairment in recognizing emotional facial expressions is presumed to be one of the mechanisms  
726 underpinning the behavioral symptoms in autism spectrum disorder which involves the rATL.<sup>95–</sup>  
727 <sup>98</sup> Recent work proposes that developmental factors might influence vulnerability to specific  
728 neurodegenerative illnesses and links to specific phenotypic presentations.<sup>99,100</sup> In particular,  
729 previous studies suggest that non-right-handedness is over-represented in svPPA compared to  
730 other PPA variants and to the general population.<sup>99</sup> In our esvFTD cohort, there was also a  
731 relatively high prevalence of non-right handedness (15%) compared to the 10% reported in the  
732 general population.<sup>101</sup> Furthermore, a previous case report described a behavioral presentation in  
733 a non-right-handed patient who had left temporal predominant atrophy.<sup>48</sup> Taken together, this  
734 evidence suggests that handedness, and thus lateralization of language and emotion processing,  
735 might influence how linguistic and behavioral symptoms associate with ATL atrophy, contributing  
736 to phenotypic variation.<sup>99,100</sup>

737  
738 Although loss of empathy is the most common symptom used by clinicians and caregivers to  
739 describe the early stages of rATL-predominant degeneration, a previous study suggested a  
740 prodromal phase of irritability, emotional distance, and changes in sleep, appetite, and libido.<sup>4</sup> In  
741 the present study we considered the subtle early emotional changes such as becoming more selfish  
742 and emotionally distant as part of loss of empathy as these symptoms are likely the subtle early  
743 manifestations of socioemotional semantic loss. Libido changes and irritability happened in the  
744 context of loss of empathy. Similarly, appetite changes happened in the context of other complex  
745 compulsions. Sleep changes happened as a prodromal symptom only in a minority of patients. It

746 is possible that the prevalence of these symptoms is underestimated and masked by the more  
747 pressing symptoms by the time patients present for evaluation.

748  
749 A recently proposed diagnostic framework for focal rATL degeneration identified memory  
750 symptoms and prosopagnosia as key features but did not distinguish between episodic or semantic  
751 memory.<sup>102</sup> Our results suggest the deficits in the rATL-predominant group extend beyond  
752 classical prosopagnosia and represent a multimodal semantic loss for person-specific concepts, but  
753 it is also possible that some rATL-predominant patients may have selective prosopagnosia  
754 (without person-specific knowledge) in the very early stage of their illness.<sup>103</sup> We believe that our  
755 large sample size, and comprehensive language and socioemotional testing battery enabled us to  
756 derive a more complete and precise depiction of symptoms, while at the same time highlighting a  
757 semantic memory deficit as the common underlying mechanism in both esvFTD and svPPA.  
758 Defining the nature of memory loss in these patients as mainly semantic rather than episodic is  
759 particularly relevant, because including episodic memory deficits as a core diagnostic criterion for  
760 rATL degeneration syndrome is likely to cause diagnostic confusion with clinical AD, particularly  
761 in settings where AD biomarkers are unavailable.

762  
763 This study has several limitations. Although our cohorts of patients were studied prospectively by  
764 a multidisciplinary team that included experts in both language and behavior, the retrospective  
765 nature of chart reviews is heavily informed by the clinician writing the original report. Given our  
766 reliance on patients' and caregivers' recollections of the symptom chronology, it is possible that  
767 recall bias may have influenced our findings (though our large sample size makes this less likely).  
768 Although it is difficult to ascertain the natural history of early symptoms in rare diseases such as  
769 the ones we study here, future collaborative, prospective cohort studies with shared measures and  
770 approaches will be imperative for making strides in this area. Another limitation pertains our  
771 imaging-based selection criteria, which focused on identifying rATL-predominant cases and  
772 excluded cases that had both concomitant severe frontal or lATL atrophy. Additional studies are  
773 needed to phenotype the subset of FTD patients with other patterns of atrophy, such as co-  
774 occurring right frontal and bilateral temporal damage. In addition, although the rATL syndrome  
775 we describe includes prominent atrophy in this area, these patients also have atrophy in a network  
776 of regions (e.g., lATL and right insula) connected to the rATL. The atrophy of each group as shown

777 in Figure 2 extends beyond the regions of maximum atrophy and as such symptoms could be due  
778 to atrophy in the other regions involved or multiple parts of the connected networks. Future work  
779 is needed to further elucidate how structural and functional damage in the rATL and its associated  
780 networks relate to the symptoms we detected in this group. Finally, we acknowledge the serious  
781 limitation that patients included in this study are mostly white, highly educated, and native English  
782 speakers. Further studies that include more diverse patient populations are needed to shed light on  
783 the cultural and environmental variability of socioemotional and linguistic presentations in patients  
784 with focal ATL degeneration,<sup>104</sup> and will provide clinical tools necessary to capture culture-  
785 specific language and emotional stimuli.

786  
787 In conclusion, we show that patients with rATL-predominant degeneration show early loss of  
788 empathy and person-specific knowledge in relation to damage to the neural systems responsible  
789 for non-verbal, socioemotional semantic knowledge. Progression of disease includes language-  
790 based semantic loss, highlighting the continuum with the semantic variant of PPA and the original  
791 description of semantic dementia. In an effort to improve precise communication, we propose the  
792 term “emotional semantic variant frontotemporal dementia (esvFTD)”, emphasizing the cognitive  
793 (semantic) and chief clinical (behavioral) features of this disorder. Specific neuropsychological  
794 tests that investigate knowledge of emotions, social concepts, and biographical information for  
795 known people are important for capturing early esvFTD symptoms and should be included in  
796 standard evaluations. Accurate identification of esvFTD patients will pave the way to better  
797 prognostication and therapeutics and will help to advance our understanding of the role of  
798 nonverbal semantics in human social behavior.

799

## 800 **Acknowledgements**

801 The authors thank the research patients and their families for the time and effort they dedicated to  
802 research at UCSF's Memory and Aging Center. VBM analyses were performed using the  
803 Brainsight system, developed at UCSF by Katherine P. Rankin, Cosmo Mielke, and Paul  
804 Sukhanov, and powered by the VLSM script written by Stephen M. Wilson, with funding from the  
805 Rainwater Charitable Foundation and the UCSF Chancellors Fund for Precision Medicine. We  
806 thank Anna Karydas and Jennifer Yokoyama (UCSF Memory and Aging Center genetics experts)



807 for assistance with genetic data, as well as Dr. John Trojanowski (Department of Pathology and  
808 Laboratory Medicine, University of Pennsylvania. Pennsylvania, Philadelphia) for assistance with  
809 autopsy data.

810

## 811 **Funding**

812 This work was funded by the National Institutes of Health (NINDS R01NS050915, NIDCD  
813 K24DC015544, NIA P50AG023501, NIA P01AG019724, NIA R01AG038791, NINDS  
814 U54NS092089, NIA K08AG052648, NIA R01AG029577, NIA P50AG023501), Alzheimer's  
815 Disease Research Center of California (03-75271 DHS/ADP/ARCC); Larry L. Hillblom  
816 Foundation; John Douglas French Alzheimer's Foundation; Koret Family Foundation; Consortium  
817 for Frontotemporal Dementia Research; and McBean Family Foundation. These supporting  
818 sources were not involved in the study design, collection, analysis or interpretation of data, nor  
819 were they involved in writing the paper or in the decision to submit this report for publication.

820

## 821 **Competing interests**

822 The authors declare that they have no known competing financial interests or personal  
823 relationships that could have appeared to influence the work reported in this paper.

824

## 825 **References:**

- 826 1. Neary D, Brun A, Englund B, et al. Clinical and neuropathological criteria for frontotemporal dementia. *J Neurol*  
827 *Neurosurg Psychiatry*. 1994;57(4):416-418. doi:10.1136/jnnp.57.4.416
- 828 2. Miller BL, Chang L, Mena I, Boone K, Lesser IM. Progressive right frontotemporal degeneration: clinical,  
829 neuropsychological and SPECT characteristics. *Dementia*. 1993;4(3-4):204-213. doi:10.1159/000107324
- 830 3. Migliaccio R, Agosta F, Rascovsky K, et al. Clinical syndromes associated with posterior atrophy: early age at onset AD  
831 spectrum. *Neurology*. 2009;73(19):1571-1578.  
832 [http://www.ncbi.nlm.nih.gov/entrez/query.fcgi?cmd=Retrieve&db=PubMed&dopt=Citation&list\\_uids=19901249](http://www.ncbi.nlm.nih.gov/entrez/query.fcgi?cmd=Retrieve&db=PubMed&dopt=Citation&list_uids=19901249)
- 833 4. Seeley WW, Bauer AM, Miller BL, et al. The natural history of temporal variant frontotemporal dementia. *Neurology*.  
834 2005;64(8):1384-1390. doi:10.1212/01.WNL.0000158425.46019.5C
- 835 5. Borghesani V, Battistella G, Mandelli ML, et al. Regional and hemispheric susceptibility of the temporal lobe to FTL-  
836 TDP type C pathology. *NeuroImage Clin*. 2020;28(November 2019):102369. doi:10.1016/j.nicl.2020.102369
- 837 6. Neary D, Snowden JS, Gustafson L, et al. Frontotemporal lobar degeneration: a consensus on clinical diagnostic criteria.  
838 *Neurology*. 1998;51(6):1546-1554. doi:10.1212/wnl.51.6.1546
- 839 7. Gorno-Tempini ML, Hillis AE, Weintraub S, et al. Classification of primary progressive aphasia and its variants.  
840 *Neurology*. 2011;76(11):1006-1014. doi:10.1212/WNL.0b013e31821103e6
- 841 8. T. E-L, B.L. M, D.F. B, et al. The temporal variant of frontotemporal dementia. *Brain*. 1997;120(6):1027-1040.  
842 <http://ovidsp.ovid.com/ovidweb.cgi?T=JS&PAGE=reference&D=emed4&NEWS=N&AN=1997184280>
- 843 9. Chan D, Anderson V, Pijnenburg Y, et al. The clinical profile of right temporal lobe atrophy. *Brain*. 2009;132(5):1287-  
844 1298. doi:10.1093/brain/awp037
- 845 10. Josephs KA, Knopman DS. Two distinct subtypes of right temporal variant frontotemporal dementia. Published online  
846 2009:1443-1450.
- 847 11. Gorno-Tempini ML, Rankin KP, Woolley JD, Rosen HJ, Phengrasamy L, Miller BL. Cognitive and behavioral profile in

- 848 a case of right anterior temporal lobe neurodegeneration. *Cortex*. 2004;40(4-5):631-644. doi:10.1016/S0010-  
849 9452(08)70159-X
- 850 12. Perry RJ, Hodges JR. Differentiating frontal and temporal variant frontotemporal dementia from Alzheimer's disease.  
851 *Neurology*. 2000;54(12):2277-2284.
- 852 13. Kumfor F, Landin-Romero R, Devenney E, et al. On the right side? A longitudinal study of left-versus right-lateralized  
853 semantic dementia. *Brain*. 2016;139(3):986-998. doi:10.1093/brain/awv387
- 854 14. Brambati SM, Amici S, Racine CA, et al. Longitudinal gray matter contraction in three variants of primary progressive  
855 aphasia: A tensor-based morphometry study. *NeuroImage Clin*. 2015;8:345-355. doi:10.1016/j.nicl.2015.01.011
- 856 15. Ding J, Chen K, Liu H, et al. A unified neurocognitive model of semantics language social behaviour and face  
857 recognition in semantic dementia. *Nat Commun*. 2020;11(1):1-14. doi:10.1038/s41467-020-16089-9
- 858 16. Snowden JS, Harris JM, Thompson JC, et al. Semantic dementia and the left and right temporal lobes. *Cortex*.  
859 2018;107:188-203. doi:10.1016/j.cortex.2017.08.024
- 860 17. Hoffman P, Jones RW, Ralph MAL. The degraded concept representation system in semantic dementia: Damage to pan-  
861 modal hub, then visual spoke. *Brain*. 2012;135(12):3770-3780. doi:10.1093/brain/awv282
- 862 18. Rice GE, Ralph MAL, Hoffman P. The roles of left versus right anterior temporal lobes in conceptual knowledge: An  
863 ALE meta-analysis of 97 functional neuroimaging studies. *Cereb Cortex*. 2015;25(11):4374-4391.  
864 doi:10.1093/cercor/bhv024
- 865 19. Ralph MAL, Jefferies E, Patterson K. The neural and computational bases of semantic cognition. *Nat Publ Gr*.  
866 2016;18(1):42-55. doi:10.1038/nrn.2016.150
- 867 20. Binney RJ, Henry ML, Babiak M, et al. Reading words and other people: A comparison of exception word, familiar face  
868 and affect processing in the left and right temporal variants of primary progressive aphasia. *Cortex*. 2016;82:147-163.  
869 doi:10.1016/j.cortex.2016.05.014
- 870 21. Henry ML, Wilson SM, Ogar JM, et al. Neuropsychological, behavioral, and anatomical evolution in right temporal  
871 variant frontotemporal dementia: A longitudinal and post-mortem single case analysis. *Neurocase*. 2014;20(1):100-109.  
872 doi:10.1080/13554794.2012.732089
- 873 22. Josephs KA, Knopman DS. Two distinct subtypes of right temporal variant fr... [Neurology. 2009] - PubMed result.  
874 Published online 2009:1443-1450. <http://www.ncbi.nlm.nih.gov/pubmed/19884571?dopt=Abstract>
- 875 23. Rankin KP, Gorno-Tempini ML, Allison SC, et al. Structural anatomy of empathy in neurodegenerative disease. *Brain*.  
876 2006;129(Pt 11):2945-2956. doi:10.1093/brain/awl254
- 877 24. Rankin KP, Kramer JH, Mychack P, Miller B. Differential patterns of empathy loss in frontal and temporal variants of  
878 FTL. [abstract]. *J Int Neuropsychol Soc*. 2002;8(2).
- 879 25. Perry RJ, Rosen HR, Kramer JH, Beer JS, Levenson RL, Miller BL. Hemispheric dominance for emotions, empathy and  
880 social behaviour: evidence from right and left handers with frontotemporal dementia. *Neurocase*. 2001;7(2):145-160.
- 881 26. Rosen HJ, Perry RJ, Murphy J, et al. Emotion comprehension in the temporal variant of frontotemporal dementia. *Brain*.  
882 2002;125(Pt 10):2286-2295.  
883 [http://www.ncbi.nlm.nih.gov/entrez/query.fcgi?cmd=Retrieve&db=PubMed&dopt=Citation&list\\_uids=12244085](http://www.ncbi.nlm.nih.gov/entrez/query.fcgi?cmd=Retrieve&db=PubMed&dopt=Citation&list_uids=12244085)
- 884 27. Rankin KP, Salazar A, Gorno-Tempini ML, et al. Detecting sarcasm from paralinguistic cues: anatomic and cognitive  
885 correlates in neurodegenerative disease. *Neuroimage*. 2009;47(4):2005-2015.  
886 [http://www.ncbi.nlm.nih.gov/entrez/query.fcgi?cmd=Retrieve&db=PubMed&dopt=Citation&list\\_uids=19501175](http://www.ncbi.nlm.nih.gov/entrez/query.fcgi?cmd=Retrieve&db=PubMed&dopt=Citation&list_uids=19501175)
- 887 28. Gainotti G. Different patterns of famous people recognition disorders in patients with right and left anterior temporal  
888 lesions: A systematic review. *Neuropsychologia*. 2007;45(8):1591-1607. doi:10.1016/j.neuropsychologia.2006.12.013
- 889 29. Irish M, Kumfor F, Hodges JR, Piguet O. A tale of two hemispheres: contrasting socioemotional dysfunction in right-  
890 versus left-lateralised semantic dementia. *Dement Neuropsychol*. 2013;7(1):88-95. doi:10.1590/S1980-  
891 57642013DN70100014
- 892 30. Lambon Ralph M a, McClelland JL, Patterson K, Galton CJ, Hodges JR. No right to speak? The relationship between  
893 object naming and semantic impairment: neuropsychological evidence and a computational model. *J Cogn Neurosci*.  
894 2001;13(3):341-356. doi:10.1162/08989290151137395
- 895 31. Ralph MAL, Jefferies E, Patterson K, Rogers TT. The neural and computational bases of semantic cognition. *Nat Rev*  
896 *Neurosci*. 2017;18(1):42-55. doi:10.1038/nrn.2016.150
- 897 32. Bozeat S, Lambon Ralph MA, Patterson K, Garrard P, Hodges JR. Non-verbal semantic impairment in semantic  
898 dementia. *Neuropsychologia*. 2000;38(9):1207-1215.  
899 [http://www.ncbi.nlm.nih.gov/entrez/query.fcgi?cmd=Retrieve&db=PubMed&dopt=Citation&list\\_uids=10865096](http://www.ncbi.nlm.nih.gov/entrez/query.fcgi?cmd=Retrieve&db=PubMed&dopt=Citation&list_uids=10865096)
- 900 33. Tranel D, Damasio H, Damasio AR. A neural basis for the retrieval of conceptual knowledge. *Neuropsychologia*.  
901 1997;35(10):1319-1327.
- 902 34. Adolphs R, Tranel D, Damasio H, Damasio A. Impaired recognition of emotion in facial expressions following bilateral  
903 damage to the human amygdala. *Nature*. 1994;372(6507):669-72.
- 904 35. Guo CC, Gorno-Tempini ML, Gesierich B, et al. Anterior temporal lobe degeneration produces widespread network-  
905 driven dysfunction. *Brain*. 2013;136(10):2979-2991. doi:10.1093/brain/awt222
- 906 36. Mummery CJ, Patterson K, Price CJ, Ashburner J, Frackowiak RS, Hodges JR. A voxel-based morphometry study of  
907 semantic demntia: relationship between temporal lobe atrophy and semantic memory. *Ann Neurol*. 2000;47(1):36-45.  
908 <http://www.ncbi.nlm.nih.gov/htbin-post/Entrez/query?db=m&form=6&dopt=r&uid=10632099>
- 909 37. Patterson K, Nestor PJ, Rogers TT. Where do you know what you know? The representation of semantic knowledge in

- 910 the human brain. *Nat Rev Neurosci*. 2007;8(12):976-987. doi:10.1038/nrn2277
- 911 38. Hodges JR, Patterson K. Semantic memory disorders. *Trends Cogn Sci*. 1997;1(2):68-72. doi:10.1016/S1364-
- 912 6613(97)01022-X
- 913 39. Brambati SM, Myers D, Wilson A, et al. The anatomy of category-specific object naming in neurodegenerative diseases. *J Cogn Neurosci*. 2006;18(10):1644-1653. doi:10.1162/jocn.2006.18.10.1644
- 914 40. Butler CR, Brambati SM, Miller BL, Gorno-Tempini ML. The neural correlates of verbal and nonverbal semantic
- 915 processing deficits in neurodegenerative disease. *Cogn Behav Neurol*. 2009;22(2):73-80.
- 916 doi:10.1097/WNN.0b013e318197925d
- 917 41. Snowden JS, Griffiths HL, Neary D. Semantic-episodic memory interactions in semantic dementia: Implications for
- 918 retrograde memory function. *Cogn Neuropsychol*. 1996;13(8):1101-1139. doi:10.1080/026432996381674
- 919 42. Luzzi S, Baldinelli S, Ranaldi V, et al. Famous faces and voices: Differential profiles in early right and left semantic
- 920 dementia and in Alzheimer's disease. *Neuropsychologia*. 2017;94(November 2016):118-128.
- 921 doi:10.1016/j.neuropsychologia.2016.11.020
- 922 43. Luzzi S, Snowden JS, Neary D, Coccia M, Provinciali L, Lambon Ralph MA. Distinct patterns of olfactory impairment
- 923 in Alzheimer's disease, semantic dementia, frontotemporal dementia, and corticobasal degeneration. *Neuropsychologia*.
- 924 2007;45(8):1823-1831. doi:10.1016/j.neuropsychologia.2006.12.008
- 925 44. Piwnica-Worms KE, Omar R, Hailstone JC, Warren JD. Flavour processing in semantic dementia. *Cortex*.
- 926 2010;46(6):761-768. doi:10.1016/j.cortex.2009.07.002
- 927 45. Winkielman P, Coulson S, Niedenthal P. Dynamic grounding of emotion concepts. *Philos Trans R Soc B Biol Sci*.
- 928 2018;373(1752). doi:10.1098/rstb.2017.0127
- 929 46. Binney RJ, Ramsey R. Social Semantics: The role of conceptual knowledge and cognitive control in a neurobiological
- 930 model of the social brain. *Neurosci Biobehav Rev*. 2020;112:28-38. doi:https://doi.org/10.1016/j.neubiorev.2020.01.030
- 931 47. Joubert S, Felician O, Barbeau E, et al. The right temporal lobe variant of frontotemporal dementia : Cognitive and
- 932 neuroanatomical profile of three patients. *J Neurol*. Published online 2006.
- 933 [http://www.ncbi.nlm.nih.gov/entrez/query.fcgi?cmd=Retrieve&db=PubMed&dopt=Citation&list\\_uids=16773268](http://www.ncbi.nlm.nih.gov/entrez/query.fcgi?cmd=Retrieve&db=PubMed&dopt=Citation&list_uids=16773268)
- 934 48. Miller ZA, Hinkley LB, Herman A, et al. Anomalous functional language lateralization in semantic variant PPA.
- 935 *Neurology*. 2015;84(2):204-206. doi:10.1212/wnl.0000000000001131
- 936 49. Gorno-tempini ML, Hillis AE, Weintraub S, et al. Classification of primary progressive aphasia and its variants.
- 937 *Neurology*. 2011;02:1-10.
- 938 50. Rascovsky K, Hodges JR, Knopman D, et al. Sensitivity of revised diagnostic criteria for the behavioural variant of
- 939 frontotemporal dementia. *Brain*. 2011;134(Pt 9):2456-2477. doi:10.1093/brain/awr179
- 940 51. Kamminga J, Kumfor F, Burrell JR, Pigué O, Hodges JR, Irish M. Differentiating between right-lateralised semantic
- 941 dementia and behavioural-variant frontotemporal dementia: An examination of clinical characteristics and emotion
- 942 processing. *J Neurol Neurosurg Psychiatry*. 2015;86(10):1082-1088. doi:10.1136/jnnp-2014-309120
- 943 52. Coon EA, Whitwell JL, Parisi JE, Dickson DW, Josephs KA. Right temporal variant frontotemporal dementia with
- 944 motor neuron disease. *J Clin Neurosci*. 2012;19(1):85-91. doi:10.1016/j.jocn.2011.06.007
- 945 53. González-Caballero G, Abellán-Miralles I, Sáenz-Sanjuan MJ. Right temporal lobe variant of frontotemporal dementia.
- 946 *J Clin Neurosci*. 2015;22(7):1139-1143. doi:10.1016/j.jocn.2014.12.022
- 947 54. Morris JC. The Clinical Dementia Rating (CDR): current version and scoring rules [see comments]. *Neurology*.
- 948 1993;43(11):2412-2414.
- 949 55. Levy R, Dubois B. Apathy and the functional anatomy of the prefrontal cortex-basal ganglia circuits. *Cereb Cortex*.
- 950 2006;16(7):916-928. doi:10.1093/cercor/bhj043
- 951 56. Magrath Guimet N, Miller BL, Allegri RF, Rankin KP. What Do We Mean by Behavioral Disinhibition in
- 952 Frontotemporal Dementia? *Front Neurol*. 2021;12(July):1-8. doi:10.3389/fneur.2021.707799
- 953 57. Vonk JMJ, Borghesani V, Battistella G, et al. Verbal semantics and the left dorsolateral anterior temporal lobe: a
- 954 longitudinal case of bilateral temporal degeneration. *Aphasiology*. 2019;00(00):1-21.
- 955 doi:10.1080/02687038.2019.1659935
- 956 58. Dunn L.M. LM& D. *Peabody Picture Vocabulary Test - Revised*. American Guidance Service; 1981.
- 957 59. Mack WJ, Freed DM, Williams BW, Henderson VW. Boston Naming Test: shortened versions for use in Alzheimer's
- 958 disease. *J Gerontol*. 1992;47(3):P154-8.
- 959 [http://www.ncbi.nlm.nih.gov/entrez/query.fcgi?cmd=Retrieve&db=PubMed&dopt=Citation&list\\_uids=1573197](http://www.ncbi.nlm.nih.gov/entrez/query.fcgi?cmd=Retrieve&db=PubMed&dopt=Citation&list_uids=1573197)
- 960 60. Howard D, Patterson K. Pyramids and palm trees: A test of semantic access form pictures and words. *Bury Saint*
- 961 *Edmunds Thames Val Test Co*. Published online 1992.
- 962 61. Froming KB, Ekman P, Levy M. Comprehensive Affect Testing System. Published online 2001.
- 963 62. McDonald S. Exploring the process of inference generation in sarcasm: a review of normal and clinical studies. *Brain*
- 964 *Lang*. 1999;68(3):486-506. doi:10.1006/brln.1999.2124
- 965 63. Shany-Ur T, Poorzand P, Grossman SN, et al. Comprehension of insincere communication in neurodegenerative disease:
- 966 Lies, sarcasm, and theory of mind. *Cortex*. 2012;48(10):1329-1341. doi:10.1016/j.cortex.2011.08.003
- 967 64. Gorno-Tempini ML, Price CJ. Identification of famous faces and buildings. A functional neuroimaging study of
- 968 semantically unique items. *Brain*. 2001;124(10):2087-2097. doi:10.1093/brain/124.10.2087
- 969 65. Davis MH. Measuring individual differences in empathy: Evidence for a multidimensional approach. *J Personal Soc*
- 970 *Psychol*. 1983;44(1).
- 971

- 972 66. Lennox RD, Wolfe RN. Revision of the Self-Monitoring Scale. *J Pers Soc Psychol.* 1984;46(6):1349-1364.  
973 doi:10.1037/0022-3514.46.6.1349
- 974 67. Wiggins JS. *Interpersonal Adjectives Scale: Professional Manual.* Psychological Assessment Resources, Inc.; 1995.
- 975 68. Carver CS, White TL. Behavioral inhibition, behavioral activation, and affective responses to impending reward and  
976 punishment: The BIS/BAS Scales. *J Pers Soc Psychol.* 1994;67(2):319-333. doi:10.1037/0022-3514.67.2.319
- 977 69. Ossenkoppele R, Cohn-Sheehy BI, La Joie R, et al. Atrophy patterns in early clinical stages across distinct phenotypes  
978 of Alzheimer's disease. *Hum Brain Mapp.* 2015;36(11):4421-4437. doi:10.1002/hbm.22927
- 979 70. La Joie R, Perrotin A, Barré L, et al. Region-specific hierarchy between atrophy, hypometabolism, and 2-amyloid (A $\beta$ )  
980 load in Alzheimer's disease dementia. *J Neurosci.* 2012;32(46):16265-16273. doi:10.1523/JNEUROSCI.2170-12.2012
- 981 71. Spina S, Brown JA, Deng J, et al. Neuropathological correlates of structural and functional imaging biomarkers in 4-  
982 repeat tauopathies. *Brain.* 2019;142(7):2068-2081. doi:10.1093/brain/awz122
- 983 72. McKeith IG. Consensus guidelines for the clinical and pathological diagnosis of dementia with Lewy bodies (DLB):  
984 report of the Consortium on DLB International Workshop. *J Alzheimers Dis.* 2006;9(3 Suppl):417-423.  
985 [http://www.ncbi.nlm.nih.gov/entrez/query.fcgi?cmd=Retrieve&db=PubMed&dopt=Citation&list\\_uids=16914880](http://www.ncbi.nlm.nih.gov/entrez/query.fcgi?cmd=Retrieve&db=PubMed&dopt=Citation&list_uids=16914880)
- 986 73. Mackenzie IRA, Neumann M, Baborie A, et al. A harmonized classification system for FTLTD-TDP pathology. *Acta*  
987 *Neuropathol.* 2011;122(1):111-113. doi:10.1007/s00401-011-0845-8
- 988 74. Montine TJ, Phelps CH, Beach TG, et al. National Institute on Aging-Alzheimer's Association guidelines for the  
989 neuropathologic assessment of Alzheimer's disease: a practical approach. *Acta Neuropathol.* 2012;123(1):1-11.  
990 doi:10.1007/s00401-011-0910-3
- 991 75. Perry DC, Brown JA, Possin KL, et al. Clinicopathological correlations in behavioural variant frontotemporal dementia.  
992 *Brain.* 2017;140(12):3329-3345. doi:10.1093/brain/awx254
- 993 76. Rankin KP. Brain Networks Supporting Social Cognition in Dementia. *Curr Behav Neurosci Reports.* Published online  
994 2020:203-211. doi:10.1007/s40473-020-00224-3
- 995 77. Yang WFZ, Toller G, Shdo S, et al. Resting functional connectivity in the semantic appraisal network predicts accuracy  
996 of emotion identification. *NeuroImage Clin.* 2021;31:102755. doi:10.1016/j.nicl.2021.102755
- 997 78. Rankin KP. Measuring Behavior and Social Cognition in FTLTD. In: Ghetti B, Buratti E, Boeve B, Rademakers R, eds.  
998 *Frontotemporal Dementias : Emerging Milestones of the 21st Century.* Springer International Publishing; 2021:51-65.  
999 doi:10.1007/978-3-030-51140-1\_4
- 1000 79. Decety J, Jackson PL. A social-neuroscience perspective on empathy. *Curr Dir Psychol Sci.* 2006;15(2):54-58.  
1001 doi:10.1111/j.0963-7214.2006.00406.x
- 1002 80. Shdo SM, Ranasinghe KG, Gola KA, et al. Deconstructing empathy: Neuroanatomical dissociations between affect  
1003 sharing and prosocial motivation using a patient lesion model. *Neuropsychologia.* 2018;116(September 2016):126-135.  
1004 doi:10.1016/j.neuropsychologia.2017.02.010
- 1005 81. Hutchings R, Palermo R, Pigué O, Kumfor F. Disrupted Face Processing in Frontotemporal Dementia: A Review of the  
1006 Clinical and Neuroanatomical Evidence. *Neuropsychol Rev.* 2017;27(1):18-30. doi:10.1007/s11065-016-9340-2
- 1007 82. Moheb N, Charuwnon K, Sciences B, et al. HHS Public Access. Published online 2019.  
1008 doi:10.1176/appi.neuropsych.18060148.Repetitive
- 1009 83. Perry DC, Whitwell JL, Boeve BF, et al. Voxel-based morphometry in patients with obsessive-compulsive behaviors in  
1010 behavioral variant frontotemporal dementia. *Eur J Neurol.* 2012;19(6):911-917. doi:10.1111/j.1468-1331.2011.03656.x
- 1011 84. Mitchell E, Tavares TP, Palaniyappan L, Finger EC. Hoarding and obsessive-compulsive behaviours in frontotemporal  
1012 dementia: Clinical and neuroanatomic associations. *Cortex.* 2019;121:443-453. doi:10.1016/j.cortex.2019.09.012
- 1013 85. Younes K, Miller BL. Neuropsychiatric Aspects of Frontotemporal Dementia. *Psychiatr Clin North Am.* Published  
1014 online 2020. doi:10.1016/j.psc.2020.02.005
- 1015 86. Snowden J, Goulding P, Neary D. Semantic dementia: A form of circumscribed cerebral atrophy. *Behav Neurol.*  
1016 1989;2(3):167-182. doi:MCI-Converted #101; Thesis\_references-Converted #324
- 1017 87. Hodges JR, Patterson K, Oxbury S, Funnell E. Semantic dementia: Progressive fluent aphasia with temporal lobe  
1018 atrophy. *Brain.* 1992;115(6):1783-1806. doi:10.1093/brain/115.6.1783
- 1019 88. Multani N, Galantucci S, Wilson SM, et al. Emotion detection deficits and changes in personality traits linked to loss of  
1020 white matter integrity in primary progressive aphasia. *NeuroImage Clin.* 2017;16(August):447-454.  
1021 doi:10.1016/j.nicl.2017.08.020
- 1022 89. Papinutto N, Galantucci S, Mandelli ML, et al. Structural connectivity of the human anterior temporal lobe: A diffusion  
1023 magnetic resonance imaging study. *Hum Brain Mapp.* 2016;37(6):2210-2222. doi:10.1002/hbm.23167
- 1024 90. Rosen HJ, Gorno-Tempini ML, Goldman WP, et al. Patterns of brain atrophy in frontotemporal dementia and semantic  
1025 dementia. *Neurology.* 2002;58(2):198-208. doi:10.1212/WNL.58.2.198
- 1026 91. Young AL, Marinescu R V., Oxtoby NP, et al. Uncovering the heterogeneity and temporal complexity of  
1027 neurodegenerative diseases with Subtype and Stage Inference. *Nat Commun.* 2018;9(1):1-16. doi:10.1038/s41467-018-  
1028 05892-0
- 1029 92. Perry DC, Datta S, Miller ZA, et al. Factors that predict diagnostic stability in neurodegenerative dementia. *J Neurol.*  
1030 2019;(0123456789). doi:10.1007/s00415-019-09362-5
- 1031 93. Younes K, Miller BL. Frontotemporal Dementia: Neuropathology, Genetics, Neuroimaging, and Treatments. *Psychiatr*  
1032 *Clin North Am.* Published online 2020. doi:10.1016/j.psc.2020.02.006
- 1033 94. Somerville LH, Fani N, McClure-Tone EB. Behavioral and neural representation of emotional facial expressions across



- 1034 the lifespan. *Dev Neuropsychol.* 2011;36(4):408-428. doi:10.1080/87565641.2010.549865
- 1035 95. Ecker C, Suckling J, Deoni SC, et al. Brain anatomy and its relationship to behavior in adults with autism spectrum
- 1036 disorder: A multicenter magnetic resonance imaging study. *Arch Gen Psychiatry.* 2012;69(2):195-209.
- 1037 doi:10.1001/archgenpsychiatry.2011.1251
- 1038 96. Zilbovicius M, Boddaert N, Belin P, et al. Temporal lobe dysfunction in childhood autism: a PET study. Positron
- 1039 emission tomography. *Am J Psychiatry.* 2000;157(12):1988-1993. doi:10.1176/appi.ajp.157.12.1988
- 1040 97. Abell F, Krams M, Ashburner J, et al. The neuroanatomy of autism: a voxel-based whole brain analysis of structural
- 1041 scans. *Neuroreport.* 1999;10(8):1647-1651.
- 1042 98. Amaral DG, Schumann CM, Nordahl CW. Neuroanatomy of autism. *Trends Neurosci.* 2008;31(3):137-145.
- 1043 doi:10.1016/j.tins.2007.12.005
- 1044 99. Miller ZA, Mandelli ML, Rankin KP, et al. Handedness and language learning disability differentially distribute in
- 1045 progressive aphasia variants. *Brain.* 2013;136(Pt 11):3461-3473. doi:10.1093/brain/awt242
- 1046 100. Rogalski E, Weintraub S, Mesulam MM. Are there susceptibility factors for primary progressive aphasia? *Brain Lang.*
- 1047 2013;127(2):135-138. doi:10.1016/j.bandl.2013.02.004
- 1048 101. McManus C. Half a century of handedness research: Myths, truths; fictions, facts; backwards, but mostly forwards.
- 1049 *Brain Neurosci Adv.* 2019;3:239821281882051. doi:10.1177/2398212818820513
- 1050 102. Erkoynun HU, Groot C, Heilbron R, et al. OUP accepted manuscript. *Brain.* Published online 2020:1-13.
- 1051 doi:10.1093/brain/awaa225
- 1052 103. Joubert S, Felician O, Barbeau E, et al. Progressive prosopagnosia. *Neurology.* 2004;63(10):1962 LP - 1965.
- 1053 doi:10.1212/01.WNL.0000144347.40132.6A
- 1054 104. Rozzini L, Bianchetti A, Lussignoli G, Cappa S, Trabucchi M. Surface dyslexia in an italian patient with semantic
- 1055 dementia. *Neurocase.* 1997;3(4):307-312. doi:10.1080/13554799708405014

1056

## 1057 Figure legends

1058 **Figure 1: Patient selection.** We searched the University of California, San Francisco Memory

1059 and Aging Center database. The first inclusion criteria was the clinical diagnosis, we included all

1060 participants who received a clinical diagnosis of behavioral variant frontotemporal dementia or

1061 semantic variant primary progressive aphasia. We then excluded all patients who did not have a

1062 brain MRI within one year of the first research evaluation. Next, we included participants who had

1063 peak atrophy in either the right temporal lobe, frontal lobe, or left temporal lobe on a brain MRI

1064 W-score map and showed predominant atrophy in their respective lobe based on an atrophy index.

1065 bvFTD = behavioral variant frontotemporal dementia spectrum disorders; svPPA = semantic

1066 variant primary progressive aphasia, posterior = parietal or occipital lobes.

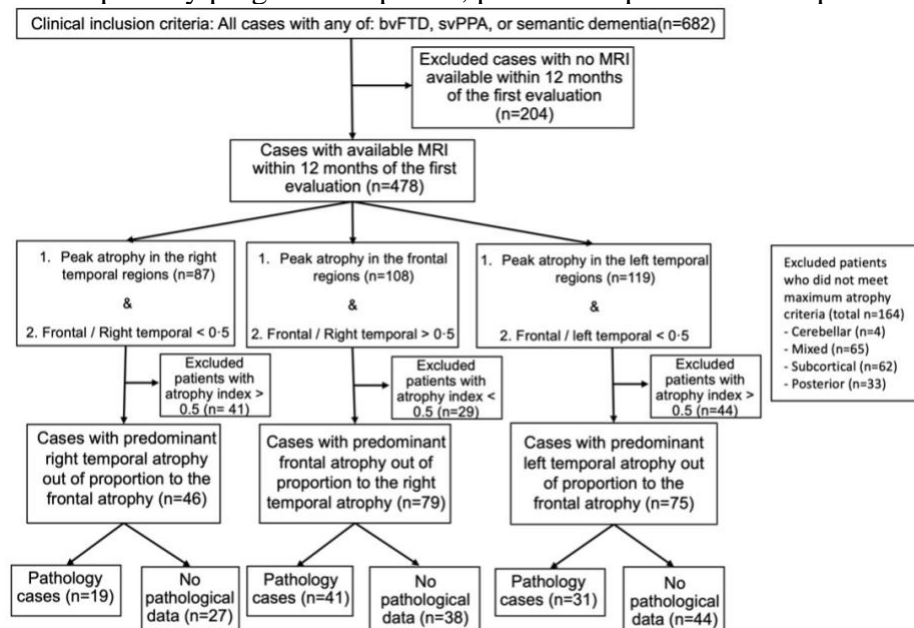

1067  
1068

1069 **Figure 2: Neuroimaging in right temporal-, left temporal-, and frontal-predominant**  
 1070 **neurodegeneration.** Lateral and mesial views. Predominant right temporal, left temporal, or  
 1071 frontal atrophy was used as part of the inclusion criteria based on a data-driven neuroimaging  
 1072 approach. The right temporal predominant group exhibited maximum atrophy in the right temporal  
 1073 lobe more than the left anterior temporal lobe with involvement of the right more than left insula,  
 1074 right caudate, and right more than left subgenual anterior cingulate cortex. Notably there is sparing  
 1075 of the frontal, parietal, and occipital lobes. The left temporal predominant group shows maximum  
 1076 atrophy in the left temporal lobe more than the right anterior temporal lobe with involvement of  
 1077 the left more than right insula, left caudate, and left subgenual anterior cingulate cortex. Further,  
 1078 there is sparing of the frontal, parietal, and occipital lobes. The frontal group shows bilateral lateral  
 1079 and mesial frontal and left temporal volume loss but relative sparing of the right temporal lobe.

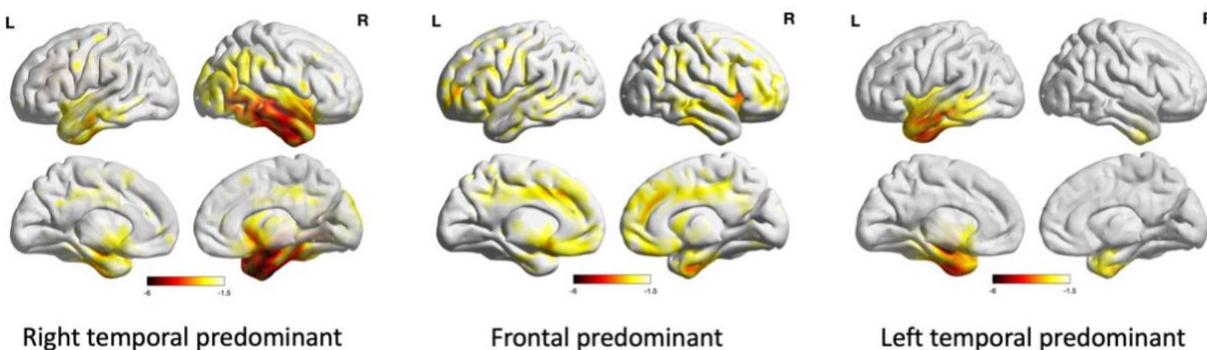

1080 **Figure 3: Chronology of symptoms.** Left upper corner shows the symptom legend. Right upper  
 1081 corner shows symptoms chronology in the right temporal-predominant group; the most common  
 1082 early symptoms in this group are loss of empathy, loss of person-specific knowledge, and rigid  
 1083 thought process and complex compulsion. The left lower corner shows symptom chronology in  
 1084 the frontal-predominant group; the most common early symptoms in this group are lack of  
 1085 judgment/dysexecutive symptoms, apathy, and disinhibition. The right lower corner shows  
 1086 symptom chronology in the left temporal-predominant group; the most common early symptoms  
 1087 in this group are verbal semantic loss, loss of person-specific knowledge, and rigid thought process  
 1088 and complex compulsion.  
 1089

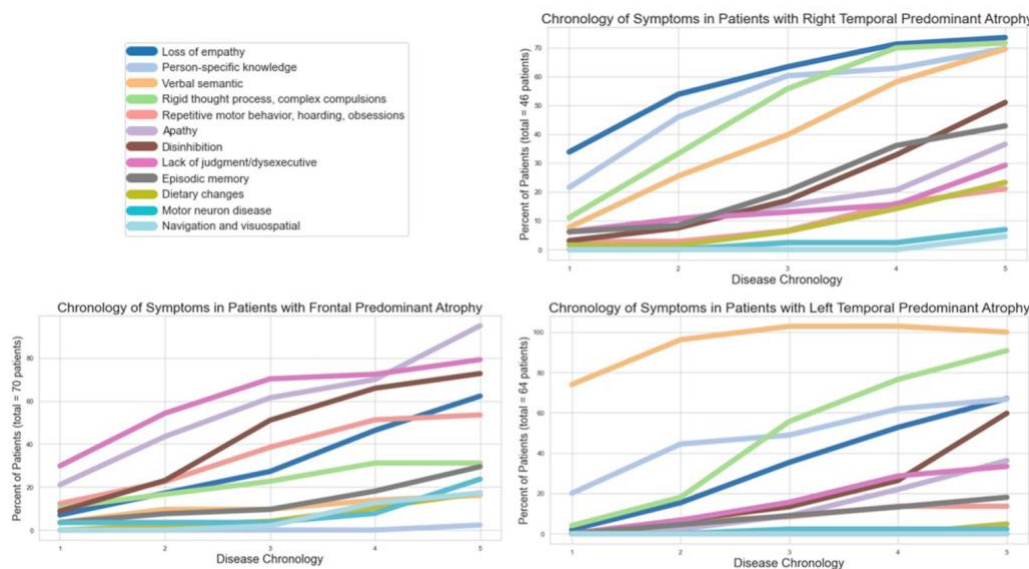



1091  
 1092 **Figure 4: Socioemotional and Neuropsychological characteristics.** The figure shows the results  
 1093 of the main socioemotional tests that can help distinguish right temporal- from frontal-predominant  
 1094 patients. More details can be found in Table 2. Although all disease groups had difficulties with  
 1095 famous faces naming, only right temporal, and a lesser degree left temporal-predominant patients,  
 1096 had difficulties on Famous Face Familiarity and Semantic Association. Although all disease  
 1097 groups showed impaired simple and complex social cues recognition on the TASIT-EET and  
 1098 TASIT-Sarcasm, only the frontal predominant group showed impairment on the control cognitive  
 1099 task, TASIT-Sincere. Right temporal-predominant patients showed significantly worse  
 1100 performance on the complex social cue, TASIT-Sarcasm, compared to the frontal predominant  
 1101 group. The right temporal-predominant group showed increased coldness compared to the frontal  
 1102 predominant group. The right and left temporal-predominant groups had difficulty with the  
 1103 emotional theory of mind but not with the cognitive theory of mind task. In contrast to the frontal-  
 1104 predominant group which demonstrated impairment in both cognitive and emotional theory of  
 1105 mind.

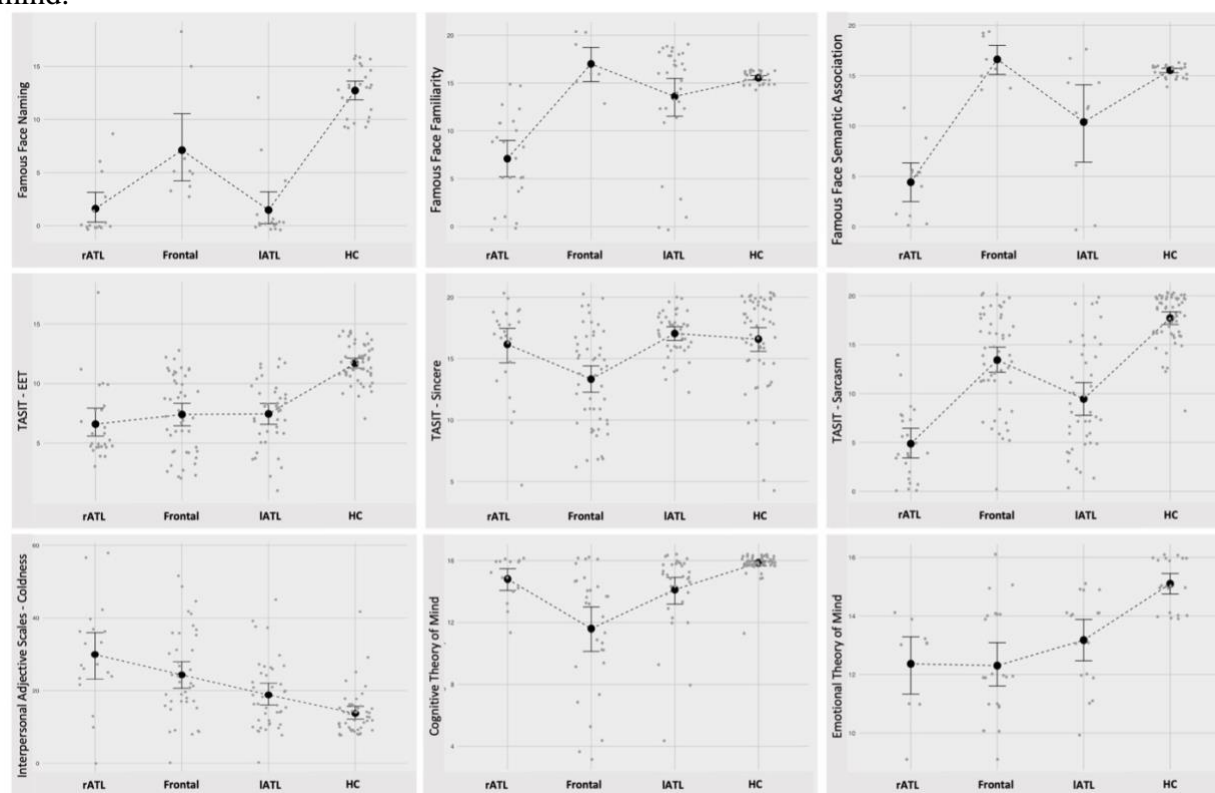

1106  
 1107  
 1108  
 1109 **Table 1: Demographics, functional, and cognitive scores.**

|                                           | Right Temporal | Frontal     | Left Temporal | Healthy Control |
|-------------------------------------------|----------------|-------------|---------------|-----------------|
| <b>Epidemiology and Functional Scales</b> |                |             |               |                 |
| Handedness, (right, left, ambidextrous)   | 39, 6, 1       | 72, 3, 3    | 68, 6, 1      | 54, 5, 0        |
| Sex, (female, male)                       | 23, 23         | 39, 40      | 35, 40        | 35, 24          |
| Ethnicity, (n)                            | 42W, 4A        | 70W, 8A, 1N | 73W, 3A       | 58W, 1A         |

|                                                        |                                  |                                  |                                  |                                   |
|--------------------------------------------------------|----------------------------------|----------------------------------|----------------------------------|-----------------------------------|
| Age of onset, mean (sd, n)                             | 60.2 (8.2, 46)                   | 56.7 (10.0, 79)                  | 58.7 (7.2, 75)                   | NA                                |
| Age at evaluation, mean (sd, n)                        | 65.11 (7.6, 46) <sup>a</sup>     | 60.75 (8.8, 79) <sup>d</sup>     | 63.12 (7.0, 75) <sup>f</sup>     | 74.05 (9.7, 59) <sup>a,d,f</sup>  |
| Years of education, mean (sd, n)                       | 15.78 (3.0, 46)                  | 15.59 (2.9, 79) <sup>d</sup>     | 16.43 (2.8, 74)                  | 17.07 (2.3, 58) <sup>d</sup>      |
| CDR score, mean (sd, n), max = 3                       | 0.97 (0.5, 45) <sup>a,c</sup>    | 0.98 (0.7, 79) <sup>d,e</sup>    | 0.67 (0.3, 69) <sup>c,e,f</sup>  | 0.0 (0.0, 59) <sup>a,d,f</sup>    |
| CDR Box Score, mean (sd, n), max = 18                  | 5.5 (3.5, 45) <sup>a,c</sup>     | 5.73 (3.9, 79) <sup>d,e</sup>    | 3.551 (2.0, 69) <sup>c,e,f</sup> | 0.01 (0.1, 59) <sup>a,d,f</sup>   |
| NPI Total (severity*frequency), EMM (se, n), max = 144 | 36.0 (20.4, 45) <sup>a,b,c</sup> | 44.7 (21.0, 46) <sup>b,d,e</sup> | 21.5 (16.2, 24) <sup>c,e,f</sup> | 8.1 (8.5, 6) <sup>a,d,f</sup>     |
| NPI Caregiver Distress Total, EMM (se, n), max = 60    | 14.9 (9.3, 45) <sup>a,b,c</sup>  | 19.5 (8.3, 47) <sup>a,b,c</sup>  | 12.5 (7.3, 22) <sup>a,b,c</sup>  | 2.5 (1.7, 9) <sup>a,b,c</sup>     |
| <b>Global Cognition</b>                                |                                  |                                  |                                  |                                   |
| MMSE, EMM (se, n), max = 30                            | 26.46 (0.87, 46) <sup>b,c</sup>  | 23.39 (0.70, 77) <sup>b,d</sup>  | 21.81 (0.69, 71) <sup>c,f</sup>  | 27.02 (0.95, 58) <sup>d,f</sup>   |
| <b>Visuospatial Processing</b>                         |                                  |                                  |                                  |                                   |
| Benson complex figure – copy, EMM (se, n), max = 17    | 14.72 (0.33, 46)                 | 13.85 (0.27, 71) <sup>e</sup>    | 15.60 (0.28, 70) <sup>e</sup>    | 14.61 (0.27, 36)                  |
| VOSP Number Location, EMM (se, n), max = 10            | 8.84 (0.26, 42) <sup>b</sup>     | 7.79 (0.22, 62) <sup>b,d,e</sup> | 9.36 (0.24, 56) <sup>e</sup>     | 9.01 (.27, 59) <sup>d</sup>       |
| <b>Episodic Memory</b>                                 |                                  |                                  |                                  |                                   |
| CVLT 30" short delay free recall, EMM (se, n), max = 9 | 3.93 (0.29, 43) <sup>a,c</sup>   | 4.70 (0.23, 65) <sup>d,e</sup>   | 2.83 (0.30, 64) <sup>c,e,f</sup> | 7.30 (0.53, 13) <sup>a,d,f</sup>  |
| CVLT 10' long delay free recall, EMM (se, n), max = 9  | 2.48 (0.32, 43) <sup>a</sup>     | 3.55 (0.26, 65) <sup>d,e</sup>   | 1.84 (0.26, 64) <sup>c,f</sup>   | 7.45 (0.59, 13) <sup>a,d,f</sup>  |
| CVLT Recognition, EMM (se, n), max = 9                 | 6.44 (0.26, 43) <sup>a,b</sup>   | 7.86 (0.21, 64) <sup>b,e</sup>   | 6.31 (0.22, 62) <sup>c,f</sup>   | 8.28 (0.49, 13) <sup>a,f</sup>    |
| Benson complex figure – delay, EMM (se, n), max = 17   | 5.62 (0.57, 44) <sup>a,b</sup>   | 8.82 (0.51, 69) <sup>b,d</sup>   | 7.36 (0.48, 75) <sup>f</sup>     | 11.57 (0.75, 36) <sup>a,d,f</sup> |
| <b>Executive Functioning</b>                           |                                  |                                  |                                  |                                   |
| Digit Span – backward, EMM (se, n)                     | 4.97 (0.17, 46) <sup>b,c</sup>   | 3.32 (0.14, 69) <sup>b,d,e</sup> | 4.73 (1.51, 66) <sup>c,e,f</sup> | 5.36 (1.90, 55) <sup>d,f</sup>    |
| Stroop (correct in 60 seconds), EMM (se, n)            | 42.80 (2.95, 26) <sup>b</sup>    | 29.45 (2.21, 46) <sup>b,e</sup>  | 37.98 (2.12, 49) <sup>e</sup>    | NA                                |
| Trails (Time), EMM (se, n), max = 120"                 | 61.40 (4.53, 42) <sup>a,c</sup>  | 73.10 (3.95, 59) <sup>d,e</sup>  | 45.23 (3.98, 61) <sup>c,e</sup>  | 32.87 (4.60, 59) <sup>a,d</sup>   |
| Design fluency, EMM (se, n)                            | 6.50 (0.48, 42) <sup>a</sup>     | 5.02 (0.40, 65) <sup>d,e</sup>   | 7.89 (0.41, 59) <sup>e,f</sup>   | 11.08 (0.49, 59) <sup>a,d,f</sup> |

CDR = Clinical Dementia Rating; CVLT = California Verbal Learning Test; FAQ = Functional Activities Questionnaire; MMSE = Mini Mental State Exam; NPI = Neuropsychiatric Inventory; NA = Not Applicable; VOSP = Visual Object and Space Perception Battery. W = White, A = Asian, N = Native American. EMM = estimated marginal means, se = standard error.

Right temporal different from health control at <.05: a

Right temporal different from frontal at <.05: b

Right temporal different from left temporal at <.05: c

Frontal different from health control at <.05: d

Frontal different from left temporal at <.05: e

Left temporal different from health control at <.05: f

**Table 2: Language and socioemotional profile.**

| Language                                      | Right Temporal                | Frontal                         | Left Temporal                 | Healthy Control                   |
|-----------------------------------------------|-------------------------------|---------------------------------|-------------------------------|-----------------------------------|
| Verbal agility, EMM (se, n), max =5           | 4.94 (0.19, 36)               | 4.73 (0.16, 54) <sup>e</sup>    | 5.44 (0.16, 57) <sup>e</sup>  | 5.25 (0.19, 52)                   |
| Repetition, EMM (se, n), max =5               | 4.16 (0.19, 36) <sup>c</sup>  | 3.84 (0.16, 57) <sup>d</sup>    | 3.46 (1.52, 57) <sup>f</sup>  | 4.43 (0.19, 59) <sup>c,d,f</sup>  |
| WRAT Reading, EMM (se, n), max =70            | 56.64 (3.02, 21) <sup>a</sup> | 54.71 (2.18, 41) <sup>d</sup>   | 50.00 (2.26, 38) <sup>f</sup> | 65.22 (2.11, 58) <sup>a,d,f</sup> |
| Apraxia of speech rating, EMM (se, n), max =7 | 0 (0.00, 27)                  | 0.14 (0.08, 14)                 | 0.06 (0.04, 49)               | 0.0 (0.00, 9)                     |
| Dysarthria rating, EMM (se, n), max =7        | 0.09 (0.04, 43) <sup>b</sup>  | 1.3 (0.09, 40) <sup>b,d,e</sup> | 0.06 (0.04, 50) <sup>e</sup>  | 0.14 (0.07, 59) <sup>d</sup>      |
| Syntax Comprehension, EMM (se, n), max =5     | 4.43 (0.14, 36)               | 3.97 (0.12, 56) <sup>e</sup>    | 4.48 (0.12, 56) <sup>e</sup>  | 4.38 (0.14, 52)                   |

1110  
1111  
1112  
1113  
1114  
1115  
1116  
1117  
1118  
1119

|                                                                |                                |                                 |                                  |                                 |
|----------------------------------------------------------------|--------------------------------|---------------------------------|----------------------------------|---------------------------------|
| Lexical fluency – # in 60", EMM (se, n)                        | 8.53 (0.64, 43) <sup>ab</sup>  | 6.16 (0.61, 69) <sup>bde</sup>  | 8.51 (0.53, 66) <sup>ef</sup>    | 14.09 (0.81, 35) <sup>adf</sup> |
| <b>Verbal Semantics</b>                                        |                                |                                 |                                  |                                 |
| BNT, EMM (se, n), max = 15                                     | 6.89 (0.43, 33) <sup>abc</sup> | 12.02 (0.35, 70) <sup>bce</sup> | 5.18 (0.36, 66) <sup>ce,f</sup>  | 12.99 (0.46, 57) <sup>df</sup>  |
| Verbal fluency – semantic – # in 60 seconds, EMM (se, n)       | 9.21 (0.76, 43) <sup>a</sup>   | 10.78 (0.74, 69) <sup>d</sup>   | 8.99 (0.64, 66) <sup>f</sup>     | 21.62 (0.78, 35) <sup>adf</sup> |
| PPVT, EMM (se, n), max =16                                     | 9.56 (0.43, 40) <sup>ab</sup>  | 13.62 (0.45, 65) <sup>bce</sup> | 9.53 (0.39, 53) <sup>ef</sup>    | 13.97 (0.46, 53) <sup>df</sup>  |
| Pyramids and Palm Trees Percent, Pictures, EMM (se, n), max =1 | 0.81 (0.02, 27) <sup>ab</sup>  | 0.90 (0.01, 49) <sup>b</sup>    | 0.86 (0.01, 53)                  | 0.90 (0.01, 30) <sup>a</sup>    |
| <b>Face perception</b>                                         |                                |                                 |                                  |                                 |
| CATS Face Matching, EMM (se, n), max =12                       | 11.24 (0.20, 31)               | 10.66 (0.18, 42) <sup>de</sup>  | 11.79 (0.17, 41) <sup>e</sup>    | 11.55 (0.18, 52) <sup>d</sup>   |
| <b>Person-specific knowledge</b>                               |                                |                                 |                                  |                                 |
| Famous Faces Naming, EMM (se, n), max =20                      | 1.26 (0.86, 15) <sup>ab</sup>  | 6.88 (1.19, 9) <sup>bde</sup>   | 1.75 (1.00, 17) <sup>ce</sup>    | 12.82 (0.87, 26) <sup>adf</sup> |
| Famous Faces Familiarity, EMM (se, n), max =20                 | 6.85 (0.88, 24) <sup>abc</sup> | 17.48 (1.70, 7) <sup>b</sup>    | 14.80 (0.92, 32) <sup>e</sup>    | 14.19 (1.10, 26) <sup>a</sup>   |
| Famous Faces Semantic Association, EMM (se, n), max =20        | 5.37 (1.13, 12) <sup>abc</sup> | 16.19 (1.2, 8) <sup>bce</sup>   | 11.75 (1.37, 10) <sup>ce</sup>   | 14.71 (0.96, 26) <sup>a</sup>   |
| Famous Faces Name Familiarity, EMM (se, n), max =16            | 2.80 (0.78, 14)                | 9.80 (1.06, 10)                 | 2.92 (0.78, 10)                  | 11.91 (0.94, 29)                |
| <b>Social Function and Emotion</b>                             |                                |                                 |                                  |                                 |
| CATS Affect Matching, EMM (se, n), max =16                     | 9.11 (0.42, 35) <sup>ac</sup>  | 9.67 (0.39, 43) <sup>de</sup>   | 12.82 (0.41, 40) <sup>ce</sup>   | 12.82 (0.46, 52) <sup>ad</sup>  |
| TASIT Emotion Evaluation Test, EMM (se, n), max =14            | 6.46 (0.48, 27) <sup>a</sup>   | 7.77 (0.40, 45) <sup>d</sup>    | 8.19 (0.42, 40) <sup>f</sup>     | 10.89 (0.40, 57) <sup>adf</sup> |
| TASIT SI-M Sincere, EMM (se, n), max =20                       | 15.99 (0.69, 24) <sup>b</sup>  | 13.42 (0.52, 51) <sup>bde</sup> | 17.16 (0.55, 42) <sup>e</sup>    | 16.64 (0.55, 58) <sup>d</sup>   |
| TASIT SI-M Sarcastic, EMM (se, n), max =20                     | 4.74 (0.85, 24) <sup>abc</sup> | 13.49 (0.65, 51) <sup>bde</sup> | 9.80 (0.67, 42) <sup>ce,f</sup>  | 17.60 (0.68, 58) <sup>adf</sup> |
| IRI-Empathetic Concern, EMM (se, n), max =24                   | 16.09 (1.41, 44) <sup>bc</sup> | 14.94 (1.12, 79) <sup>de</sup>  | 21.87 (1.14, 75) <sup>ce,f</sup> | 27.41 (1.56, 54) <sup>adf</sup> |
| IRI-Perspective Taking, EMM (se, n), max =24                   | 10.77 (1.10, 44) <sup>ac</sup> | 10.22 (0.87, 79) <sup>de</sup>  | 14.63 (0.89, 75) <sup>ce,f</sup> | 22.86 (1.22, 54) <sup>adf</sup> |
| Emotional Theory of Mind, EMM (se, n), max =16                 | 12.25 (0.46, 9) <sup>a</sup>   | 12.44 (0.29, 23) <sup>de</sup>  | 13.86 (0.36, 17) <sup>e</sup>    | 14.62 (0.35, 20) <sup>ad</sup>  |
| Cognitive Theory of Mind, EMM (se, n), max =16                 | 14.79 (0.58, 15) <sup>b</sup>  | 12.04 (0.44, 30) <sup>bde</sup> | 15.07 (0.44, 33) <sup>d</sup>    | 15.07 (0.35, 59) <sup>e</sup>   |
| Behavioral Inhibition BIS-Total, EMM (se, n), max =24          | 17.39 (0.73, 24)               | 17.49 (0.55, 54) <sup>e</sup>   | 19.85 (0.59, 41) <sup>ef</sup>   | 15.95 (0.61, 54) <sup>f</sup>   |
| Behavioral Activation BAS-Drive, EMM (se, n), max =24          | 8.56 (0.56, 25)                | 10.21 (0.42, 50)                | 9.99 (0.44, 38)                  | 10.40 (0.47, 54)                |
| Behavioral Activation BAS-Fun, EMM (se, n), max =24            | 7.54 (0.49, 25) <sup>ab</sup>  | 9.47 (0.39, 50) <sup>b</sup>    | 8.69 (0.42, 36)                  | 9.50 (0.42, 53) <sup>a</sup>    |
| Behavioral Activation BAS-Reward, EMM (se, n), max =24         | 13.13 (0.52, 25) <sup>ac</sup> | 13.59 (0.42, 51) <sup>e</sup>   | 15.69 (0.44, 38) <sup>ce</sup>   | 15.08 (0.45, 54) <sup>a</sup>   |
| IAS - Current warmth, EMM (se, n)                              | 37.59 (3.02, 13) <sup>bc</sup> | 38.86 (1.95, 36) <sup>de</sup>  | 46.56 (1.84, 44) <sup>ce</sup>   | 47.89 (2.12, 44) <sup>ad</sup>  |
| IAS - Current dominance, EMM (se, n)                           | 37.24 (2.59, 13)               | 30.86 (1.68, 36) <sup>de</sup>  | 37.76 (1.58, 44) <sup>e</sup>    | 42.21 (1.82, 44) <sup>d</sup>   |
| IAS - Current Coldness, EMM (se, n)                            | 29.53 (2.27, 13) <sup>ac</sup> | 24.77 (1.71, 36) <sup>d</sup>   | 18.88 (1.71, 44) <sup>e</sup>    | 13.72 (1.83, 44) <sup>ad</sup>  |
| Self-Monitoring RSMS, EMM (se, n), max =65                     | 36.57 (2.32, 28) <sup>bc</sup> | 38.68 (1.78, 55) <sup>de</sup>  | 45.14 (1.86, 49) <sup>ce,f</sup> | 59.05 (2.24, 47) <sup>adf</sup> |
| Depression GDS, EMM (se, n), max =30                           | 7.56 (0.94, 37) <sup>a</sup>   | 8.88 (.87, 54) <sup>d</sup>     | 8.54 (.83, 50) <sup>f</sup>      | 3.38 (0.92, 58) <sup>adf</sup>  |

BNT = Boston Naming Test; PPVT = Peabody Picture Vocabulary Test; CATS = Comprehensive Affect Testing System; TASIT = The Awareness of Social Inference Test; EET = Emotion Evaluation Test; IRI = Interpersonal Reactivity Index; EC = Empathic Concern; PT = Perspective Taking; IAS = Interpersonal Adjective Scales; RSMS = Revised Self-Monitoring Scale. GDS = Geriatric Depression Scale. \* = Autopsy Group and Living Group are statistically different  $p < .05$ . W = White, A = Asian, N = Native American. EMM = estimated marginal means, se = standard error.

Right temporal different from health control at  $<.05$ : a

Right temporal different from frontal at  $<.05$ : b

Right temporal different from left temporal at  $<.05$ : c

Frontal different from health control at  $<.05$ : d

Frontal different from left temporal at  $<.05$ : e

Left temporal different from health control at  $<.05$ : f

**Table 3: Primary pathology and genetics:**

| Primary pathology                  | Frontal, total = 41<br>n (%) | Left Temporal total = 31<br>n (%) | Right temporal total = 19<br>n (%) |
|------------------------------------|------------------------------|-----------------------------------|------------------------------------|
| Alzheimer's disease                | 1 (2.4)                      | 1 (3.2)                           |                                    |
| Argyrophilic grain disease         | 1 (2.4)                      |                                   |                                    |
| FTLD-tau corticobasal degeneration | 9 (21.9)                     |                                   |                                    |

1120  
1121  
1122  
1123  
1124  
1125  
1126  
1127  
1128  
1129  
1130  
1131

|                                         |                                      |                                            |                                             |
|-----------------------------------------|--------------------------------------|--------------------------------------------|---------------------------------------------|
| FTLD-tau Pick's Disease                 | 7 (17.0)                             | 1 (3.2)                                    | 2 (10.5)                                    |
| FTLD-tau progressive supranuclear palsy | 3 (7.3)                              |                                            |                                             |
| FTLD-TDP type A                         | 5 (12.2)                             | 1 (3.2)                                    | 1 (5.2)                                     |
| FTLD-TDP type B                         | 9 (21.9)                             | 4 (12.9)                                   | 1 (5.2)                                     |
| FTLD-TDP type C                         | 1 (2.4)                              | 23 (74.1)                                  | 13 (68.4)                                   |
| FTLD-TDP unclassifiable                 | 4 (9.7)                              |                                            | 1 (5.2)                                     |
| FTLD-tau unclassifiable                 | 1 (2.4)                              |                                            | 1 (5.2)                                     |
| FTLD-tau with MAPT mutation             |                                      | 1 (3.2)                                    |                                             |
| <b>Genetics</b>                         | <b>Frontal, total = 73<br/>n (%)</b> | <b>Left temporal, total = 61<br/>n (%)</b> | <b>Right temporal, total = 38<br/>n (%)</b> |
| MAPT                                    |                                      | 3 (4.9) (2 and 1 possibly pathogenic)      | 1 (2.6)                                     |
| TARDBP                                  |                                      |                                            | 1 Possibly Pathogenic (2.6)                 |
| C9ORF72                                 | 14 (19.1)                            | 2 (3.2)                                    |                                             |
| GRN                                     | 3 (4.1)                              |                                            |                                             |

1132  
1133  
1134  
1135

**Table 4: Proposed diagnostic criteria for emotional semantic variant frontotemporal dementia (esvFTD)**

|                                                                                                                                                                                                                                                                                                                                                                               |
|-------------------------------------------------------------------------------------------------------------------------------------------------------------------------------------------------------------------------------------------------------------------------------------------------------------------------------------------------------------------------------|
| <b>I. Patient shows gradually progressive deterioration by history and/or testing</b>                                                                                                                                                                                                                                                                                         |
| <b>II. Possible esvFTD:</b><br>Patient must have two out of the core features A-C and one out of the supportive features D-F                                                                                                                                                                                                                                                  |
| <b>CORE FEATURES</b><br>A. Loss of empathy (difficulty understanding emotions)<br>B. Difficulty naming and identifying known people<br>C. Complex compulsions or rigid thought process                                                                                                                                                                                        |
| <b>SUPPORTIVE FEATURES</b><br>D. Object naming difficulties<br>E. Spared visuospatial functions including preserved perceptual matching and drawing reproduction<br>F. Spared motor speech and phonology                                                                                                                                                                      |
| <b>III. Probable esvFTD:</b><br>All the following must be present:<br>A. Meets criteria for possible esvFTD<br>B. Imaging results consistent with esvFTD:<br>1 - Right anterior temporal lobe volume loss and relative sparing of the frontal cortex on MRI or CT or<br>2 - Right anterior temporal lobe hypometabolism and relative sparing of the frontal cortex on FDG-PET |

1136  
1137  
1138  
1139  
1140  
1141  
1142  
1143  
1144  
1145  
1146  
1147  
1148  
1149  
1150  
1151
